# Supplementary material
Source: Royal Society of Chemistry journal article supplement (doi:10.1039/d5ta08285d)

## *Supporting Information*

### **Ultrasonic exfoliation of a Cd-based metal–organic framework into ultrathin nanosheet for visible-light-initiated trifluoromethylation and sequential oxidation–cyclisation reaction**

Xiong-Feng Ma,<sup>a</sup> Jianfei Tong,<sup>a</sup> Zhuang Miao,<sup>a</sup> Xiaodun Deng,<sup>a</sup> Zhiqiang Zhang,<sup>a</sup> Chunyang Zhao,<sup>\*,c</sup> Yangyang Liu,<sup>a</sup> Chengyu Xi,<sup>a</sup> Hongliang Du,<sup>\*,a</sup> Chaoqian Ai,<sup>a</sup> Wenke Li,<sup>a</sup> Hui Chen,<sup>\*,b</sup>

<sup>a</sup> *College of Engineering, Xi'an International University, Xi'an, Shaanxi, China.*

<sup>b</sup> *School of Chemistry and Chemical Engineering, Xi'an University of Architecture and Technology, Xi'an, Shaanxi, China.*

<sup>c</sup> *School of Science, Xihua University, Chengdu, Sichuan, China*

\*Correspondence Email: duhongliang@126.com, huichen@xauat.edu.cn, 0120240049@xhu.edu.cn

---

## Experimental Section

### Materials and Measurements.

All reagents and solvents are commercially available (Beijing innoChem Science & Technology Co. Ltd.), and they were further dried by the vacuum rotary evaporator to remove all traces of water and then stored in the air-filled glovebox. The 15 mL Schlenk tube charged with a magnetic stirrer, which was used as the reactor in the thioether oxidation and benzyl alcohol dehydrogenation reactions. The light was provided by a 30 W red LED light.

The chemical structures of the products were confirmed by comparison with standard chemicals and GC-MS (Agilent Technologies, GC 7890B, MS 5977A) data. GC equipped with a FID detector (Agilent Technologies, GC 7890 B) and a HP-5 5% phenyl methyl siloxane column (30m × 0.32mm × 0.5 μm), which was used for the quantifiable measure of benzotrifluoride and 2-phenylbenzimidazole. The size and morphology of catalysts were measured by a Hitachi New Generation SU8010 field emission scanning electron microscope (FE-SEM, JSM-670 F). The transmission electron microscopy (TEM) images, high-resolution transmission electron microscopy (HRTEM) images (with an acceleration voltage of 200 kV), and selected area fast Fourier transform (FFT) pattern were measured on a JEOL JEM-3000F microscope, which with a CCD camera as the detector. A Varian Cary 500 UV-Vis spectrophotometer was used to record the UV-Vis diffuse reflectance spectra (DRS) of various solid samples. The photoelectrochemical characterization was performed on a Metrohm-Autolab AUT302N Electrochemical workstation. Photocurrent measurements were carried out in a typical three-electrode configuration with an Ag/AgCl electrode, a coiled Pt wire as the reference and counter electrode, respectively. X-ray diffraction (XRD) studies of catalyst were carried out with a Bruker D8 Advance instrument. The electron paramagnetic resonance (EPR) experiments were carried out on Bruker A300 instrument operating in the X-band at room temperature.

### Single-crystal X-ray crystallography.

Diffraction data for all complexes were measured on a Bruker SMART CCD diffractometer (Mo K $\alpha$  radiation and  $\lambda = 0.71073 \text{ \AA}$ ) in  $\Phi$  and  $\omega$  scan modes. All structures were solved by direct methods, followed by difference Fourier syntheses, and then refined by full-matrix least-squares techniques on  $F^2$  using SHELXL.<sup>[1]</sup> All other non-hydrogen atoms were refined with anisotropic thermal parameters. Hydrogen atoms were placed in the calculated position and refined in the isotropic direction using a riding model. Table S1 summarizes X-ray crystallographic data and refinement details for the complexes. The CCDC reference number is 2494196 for **XAIU-5**.

[1] Sheldrick, G. M. *Acta Crystallogr., Sect. C: Struct. Chem.* **2015**, *71*, 3-8.

**Table S1.** Crystallographic data of **XAIU-5**.

| Complex                                                         | XAIU-5                                            |
|-----------------------------------------------------------------|---------------------------------------------------|
| Formula                                                         | C <sub>20</sub> H <sub>18</sub> CdNO <sub>6</sub> |
| Formula weight                                                  | 480.75                                            |
| <i>T</i> (K)                                                    | 100.00 (10)                                       |
| Crystal system                                                  | Triclinic                                         |
| Space group                                                     | <i>P</i> -1                                       |
| <i>a</i> (Å)                                                    | 9.0623 (2)                                        |
| <i>b</i> (Å)                                                    | 10.2537 (2)                                       |
| <i>c</i> (Å)                                                    | 13.1574 (2)                                       |
| <i>α</i> (°)                                                    | 103.975 (2)                                       |
| <i>β</i> (°)                                                    | 94.456 (2)                                        |
| <i>γ</i> (°)                                                    | 90.700 (2)                                        |
| <i>V</i> (Å <sup>3</sup> )                                      | 1182.23 (4)                                       |
| <i>Z</i>                                                        | 2                                                 |
| <i>D<sub>c</sub></i> (g cm <sup>-3</sup> )                      | 1.351                                             |
| <i>μ</i> (mm <sup>-1</sup> )                                    | 7.665                                             |
| Reflns coll.                                                    | 13486                                             |
| Unique reflns                                                   | 4670                                              |
| <i>R</i> <sub>int</sub>                                         | 0.0322                                            |
| <sup>a</sup> <i>R</i> <sub>1</sub> [ <i>I</i> ≥ 2σ( <i>I</i> )] | 0.0440                                            |
| <sup>b</sup> <i>wR</i> <sub>2</sub> (all data)                  | 0.1513                                            |
| GOF                                                             | 1.175                                             |

$${}^aR_1 = \frac{\sum ||F_o| - |F_c||}{\sum |F_o|}, {}^b wR_2 = \left[ \frac{\sum w(F_o^2 - F_c^2)^2}{\sum w(F_o^2)^2} \right]^{1/2}$$

**Table S2.** Selected bond lengths (Å) and angles (°) of **XAIU-5**.

| Bond lengths (Å)                                                                              |             |                                        |             |                         |             |
|-----------------------------------------------------------------------------------------------|-------------|----------------------------------------|-------------|-------------------------|-------------|
| Cd1—O2 <sup>i</sup>                                                                           | 2.307 (4)   | Cd1—O4 <sup>ii</sup>                   | 2.345 (4)   | Cd1—O5                  | 2.257 (4)   |
| Cd1—O3 <sup>ii</sup>                                                                          | 2.399 (4)   | Cd1—O1                                 | 2.232 (4)   | Cd1—O6                  | 2.345 (5)   |
| Bond angles (°)                                                                               |             |                                        |             |                         |             |
| O2 <sup>i</sup> —Cd1—O3 <sup>ii</sup>                                                         | 93.80 (13)  | O5—Cd1—O4 <sup>ii</sup>                | 145.94 (14) | O1—Cd1—O3 <sup>ii</sup> | 141.99 (13) |
| O2 <sup>i</sup> —Cd1—O4 <sup>ii</sup>                                                         | 100.87 (14) | O5—Cd1—O6                              | 85.21 (18)  | O1—Cd1—O5               | 126.61 (14) |
| O2 <sup>i</sup> —Cd1—O6                                                                       | 165.81 (18) | O4 <sup>ii</sup> —Cd1—O3 <sup>ii</sup> | 55.42 (12)  | O1—Cd1—O4 <sup>ii</sup> | 86.91 (13)  |
| O5—Cd1—O2 <sup>i</sup>                                                                        | 81.62 (14)  | O4 <sup>ii</sup> —Cd1—O6               | 92.99 (19)  | O1—Cd1—O6               | 84.92 (17)  |
| O5—Cd1—O3 <sup>ii</sup>                                                                       | 90.58 (13)  | O1—Cd1—O2 <sup>i</sup>                 | 98.72 (14)  | O6—Cd1—O3 <sup>ii</sup> | 91.58 (17)  |
| Symmetry codes: (i) -x+1, -y+1, -z+1; (ii) x, y-1, z; (iii) -x+2, -y+2, -z+2; (iv) x, y+1, z. |             |                                        |             |                         |             |

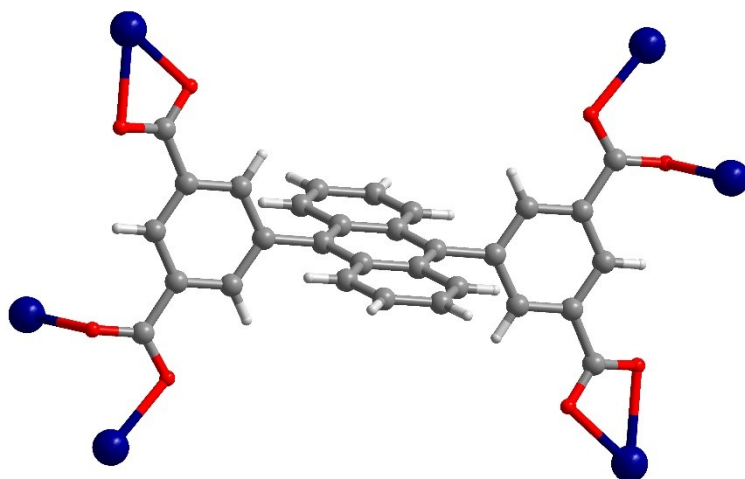

**Figure S1.** The coordinated mode for ADPA<sup>4-</sup> ligand for XAIU-5.

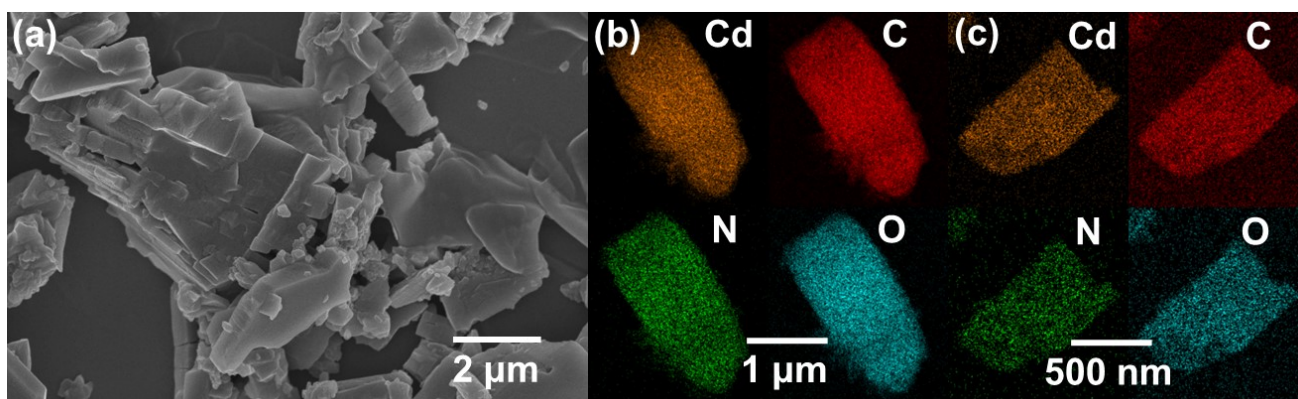

**Figure S2.** (a) The FE-SEM images of XAIU-5; TEM mapping images of XAIU-5 (b) and XAIU-5-NS (c).

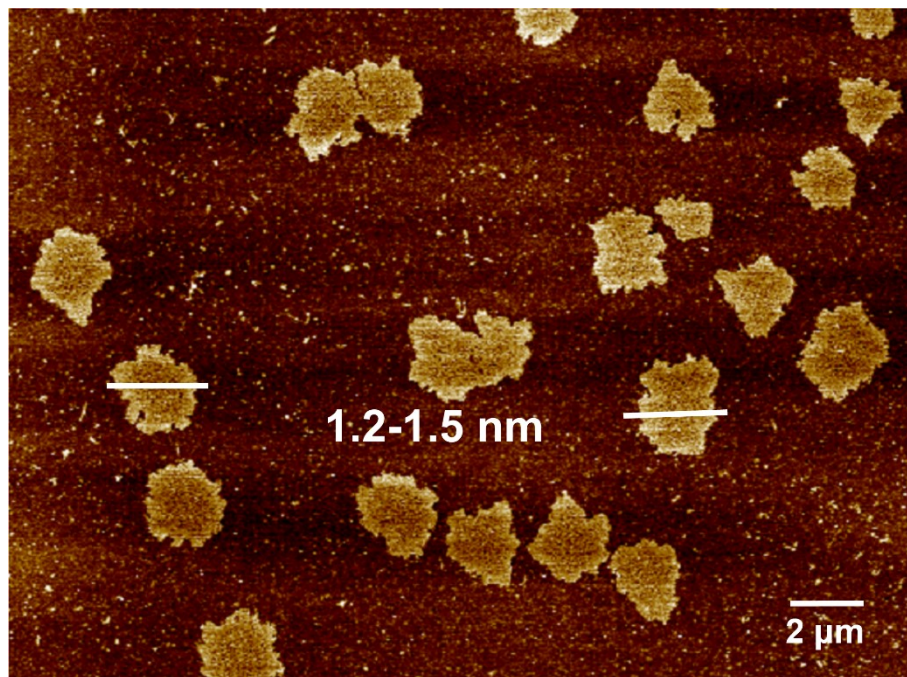

**Figure S3.** AFM image of XAIU-5-NS.

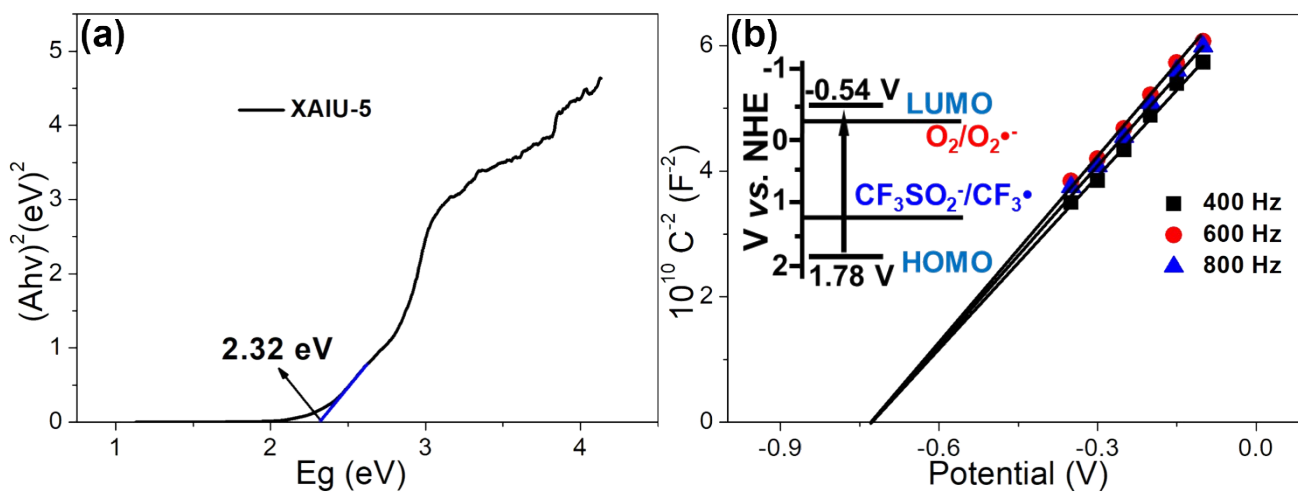

**Figure S4.** (a) The Tauc plot of XAIU-5; (b) the Mott-Schottky plots for XAIU-5 in 0.2 mol/L  $\text{Na}_2\text{SO}_4$  aqueous solution.

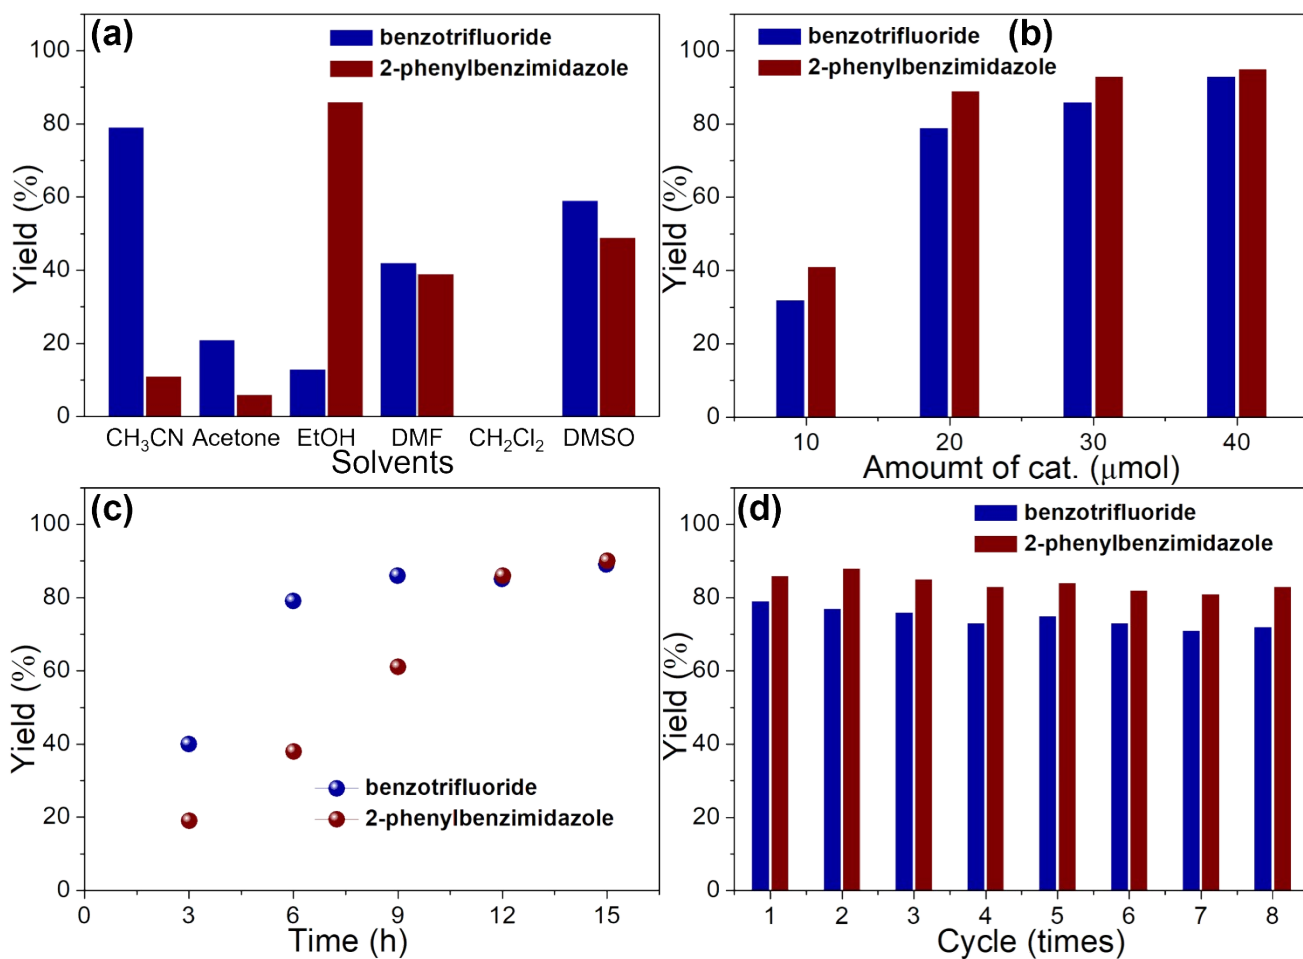

**Figure S5.** (a) Yields of benzotrifluoride and 2-phenylbenzimidazole in different solvents; (b) the influence of photocatalyst amounts in photocatalytic reactions; (c) the influence of irradiation time on the yield of benzotrifluoride and 2-phenylbenzimidazole of **XAIU-5-NS**; (d) cycling runs for the photocatalytic trifluoromethylation reaction and the sequential oxidation–cyclisation reaction in the presence of **XAIU-5-NS**.

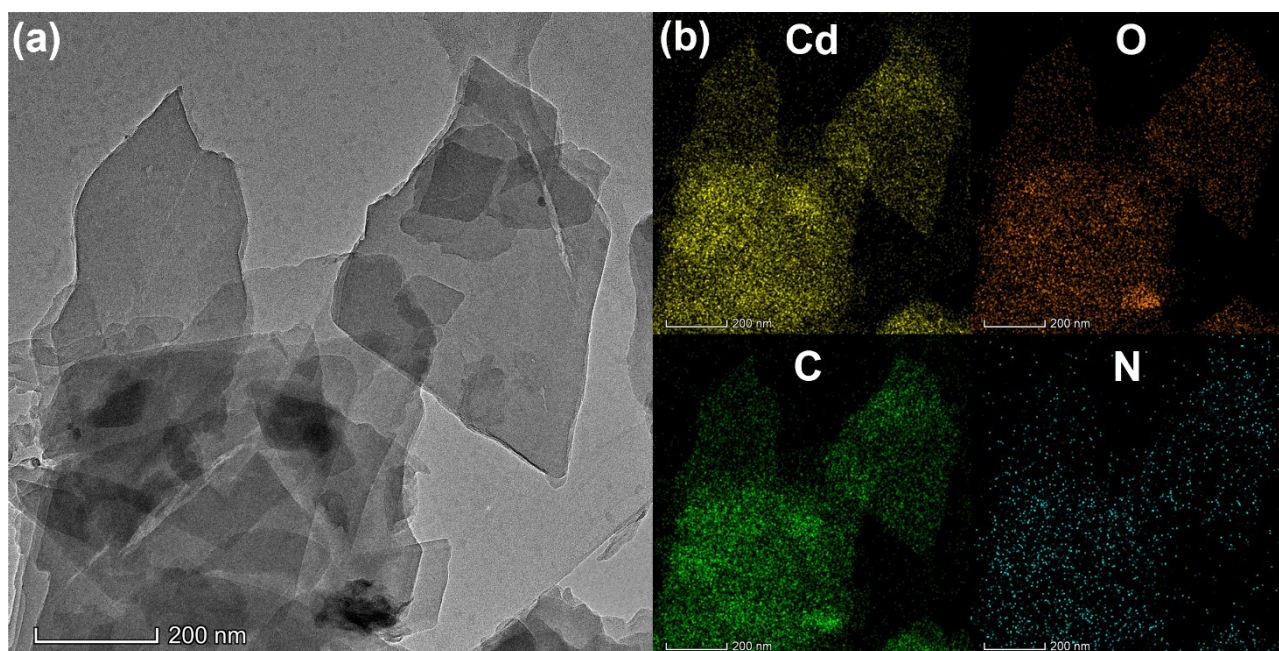

**Figure S6.** (a) The TEM image of **XAIU-5-NS** after eight cycles of reaction; (b) TEM mapping images of **XAIU-5-NS** after eight cycles of reaction.

## **NMR Data of Products**

### **Separation process for target products**

After reaction, solvent not participating in the reaction was removed under reduced pressure. The crude products were purified by  $\text{SiO}_2/\text{Al}_2\text{O}_3$  column chromatography using acetic ether and petroleum ether (V:V=1:1) as an eluent so that the white solids acylamide derivatives can be obtained. 0.25 mm silica gelcoated glass plates were used in the thin layer chromatography (TLC).

61655-67-2. 10. 1. 1r

<sup>1</sup>H NMR (500 MHz, CDCl<sub>3</sub>) δ 9.00, 9.00, 8.84, 8.84, 8.74.

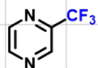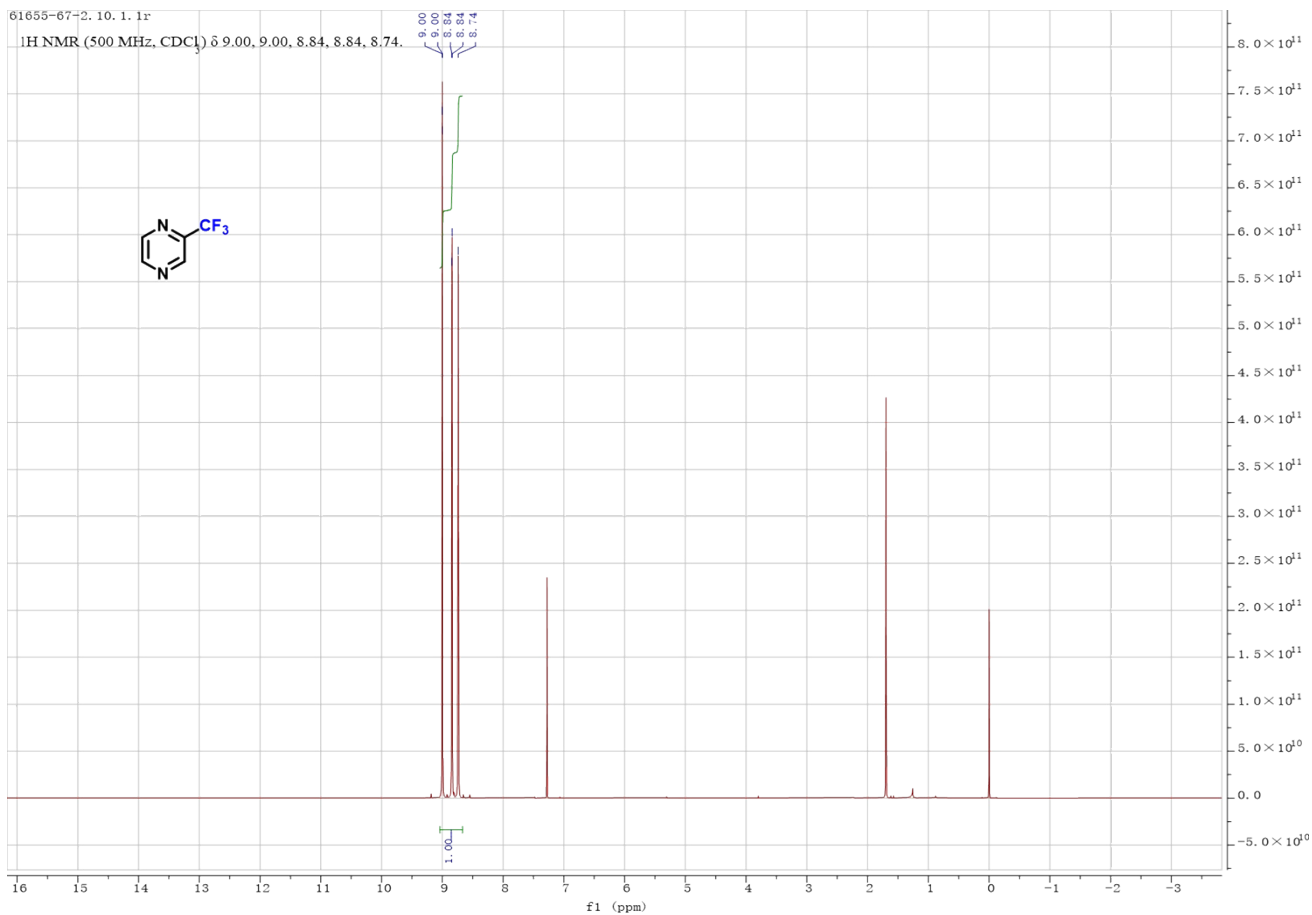

61655-67-2. 11. 1. 1r

<sup>13</sup>C NMR (126 MHz, CDCl<sub>3</sub>) δ 147.83, 144.40, 141.89, 141.89, 122.13.

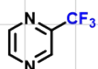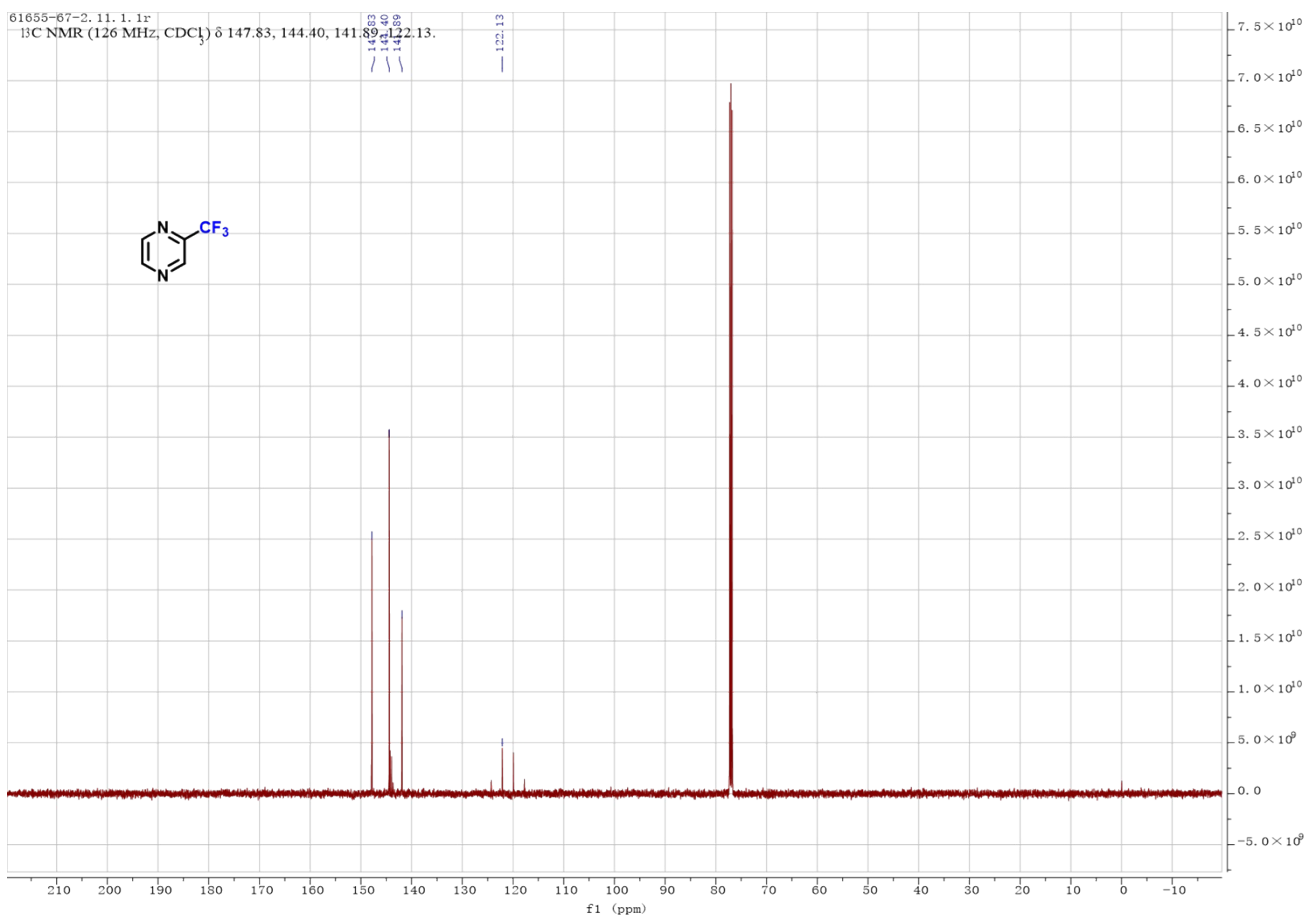

61655-67-2. 12. 1. 1r  
19F NMR (471 MHz, CDCl<sub>3</sub>) δ -67.86.

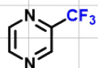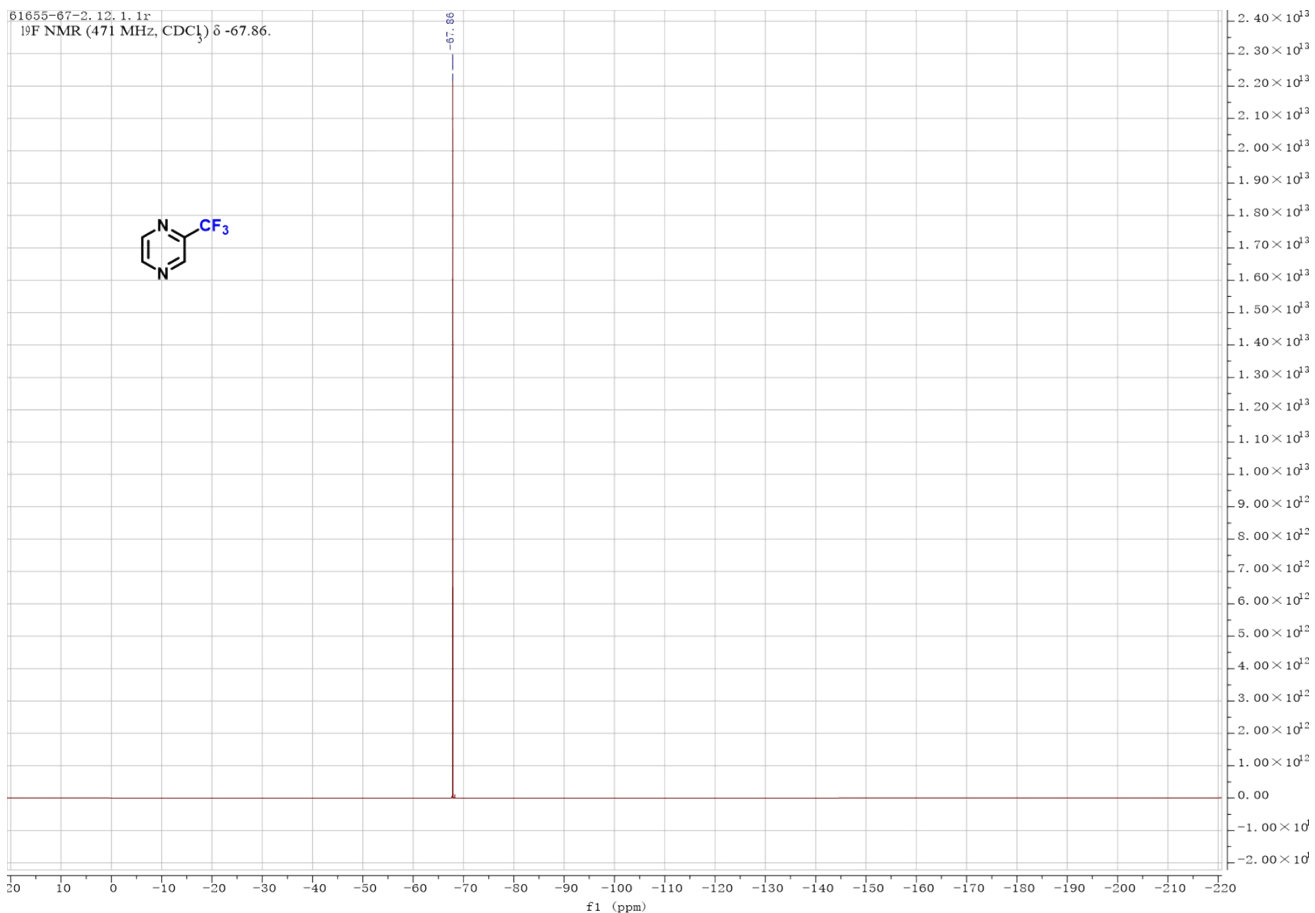

F4. 10. fid  
1H NMR (500 MHz, CDCl<sub>3</sub>) δ 7.68, 7.68, 7.46, 7.45, 7.26.

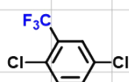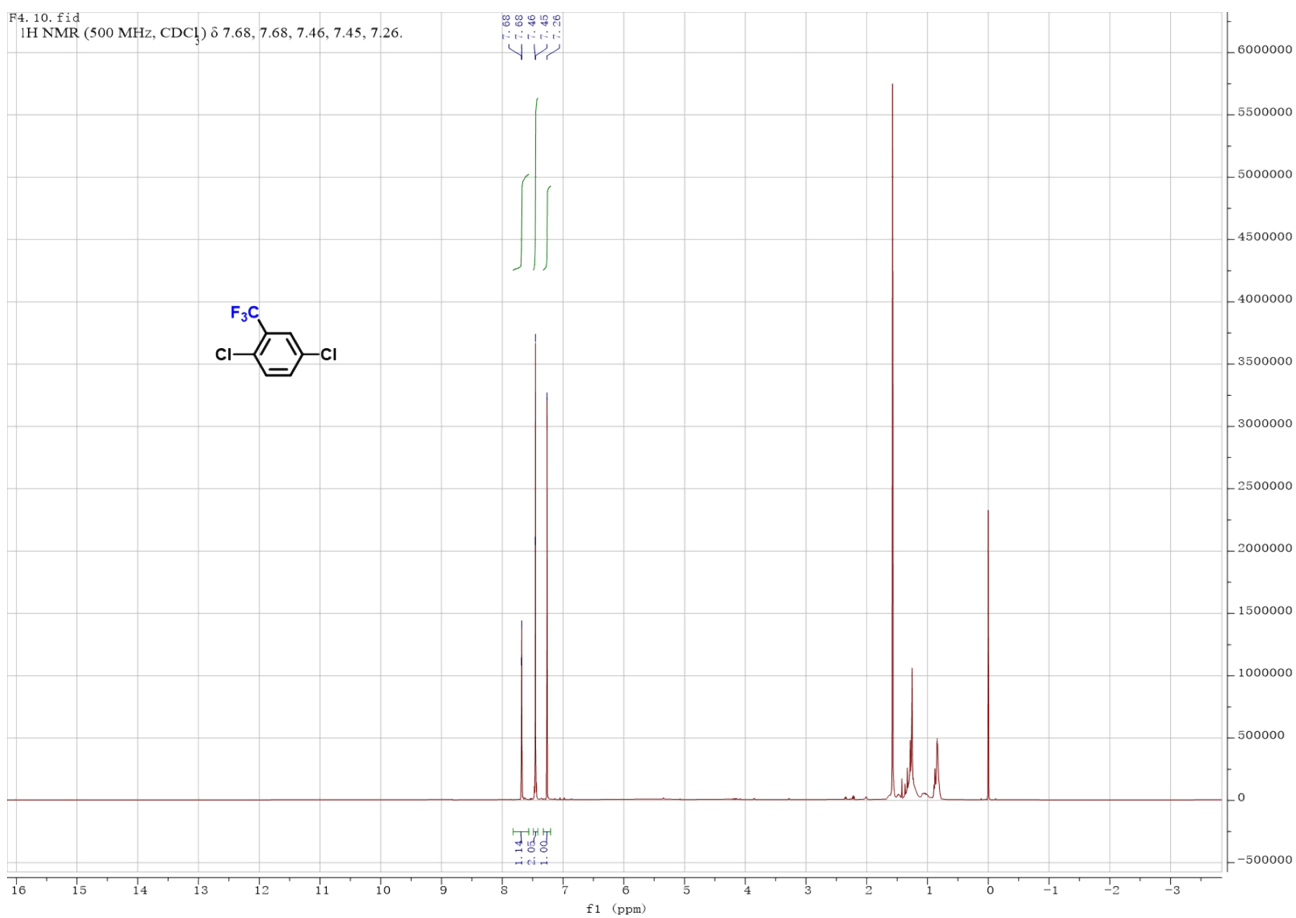

F4.11.fid  
<sup>13</sup>C NMR (126 MHz, CDCl<sub>3</sub>) δ 132.66, 130.71, 129.68, 127.86, 127.82, 123.15, 120.97.

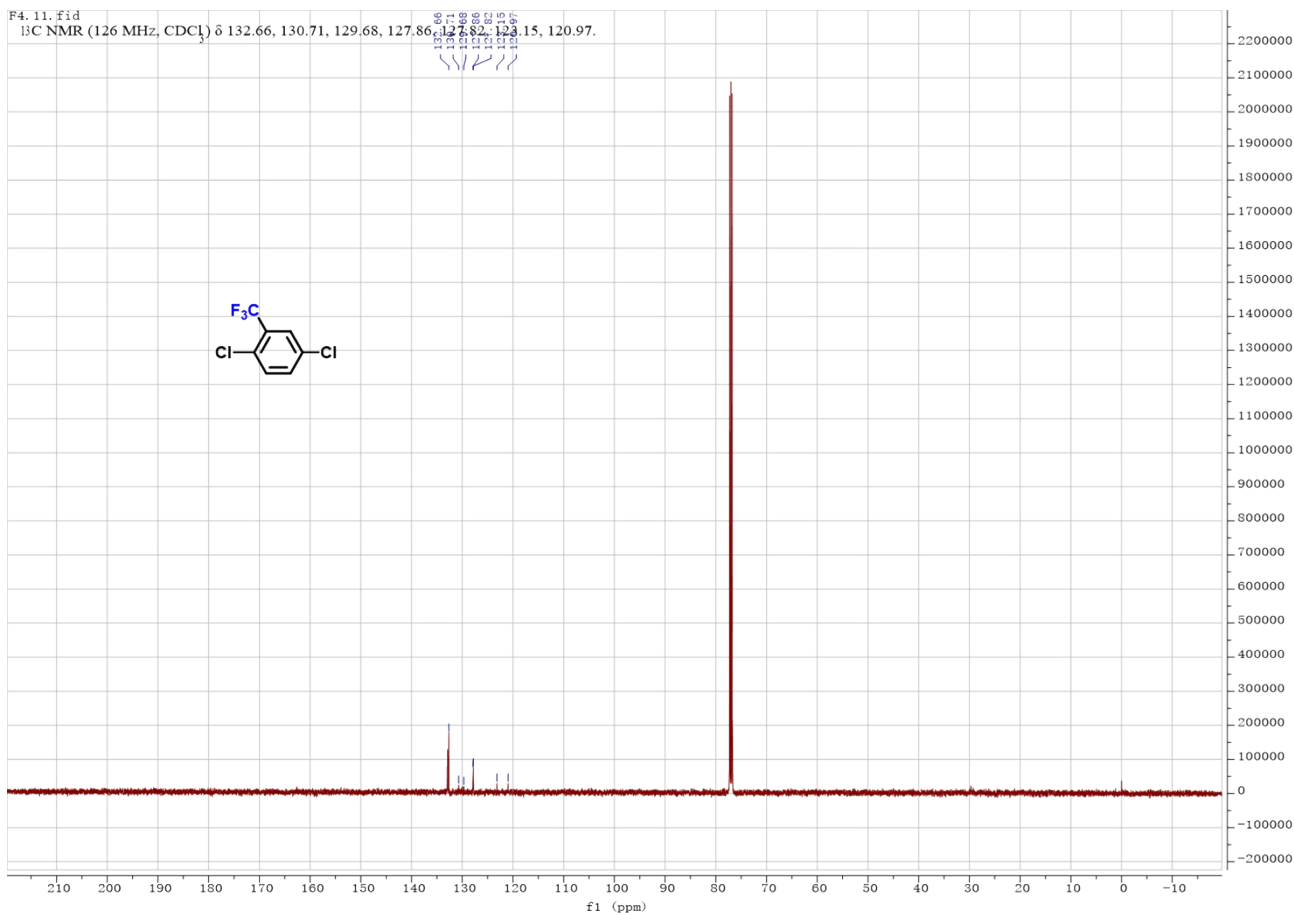

F4.12.fid  
<sup>19</sup>F NMR (471 MHz, CDCl<sub>3</sub>) δ -63.09.

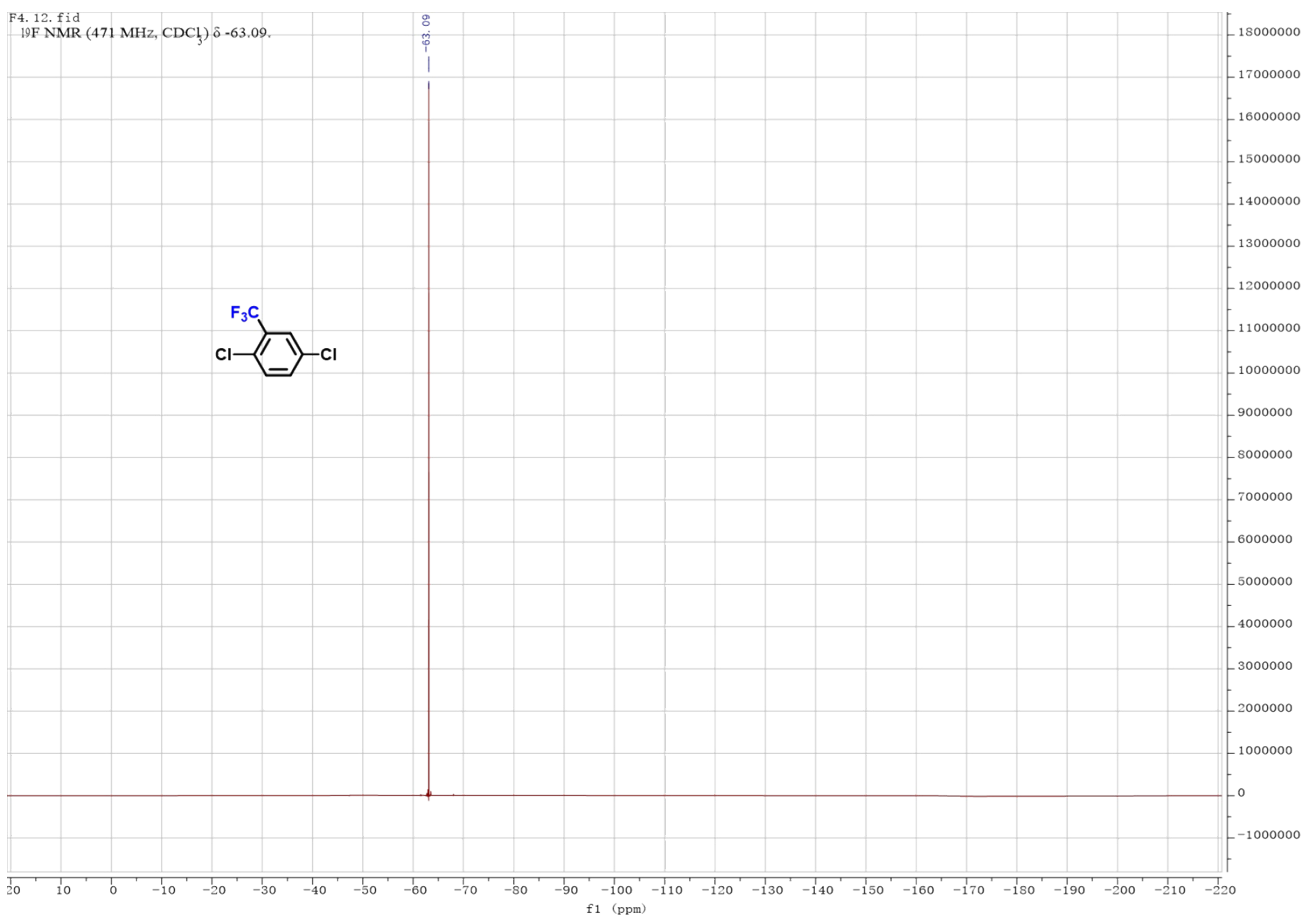

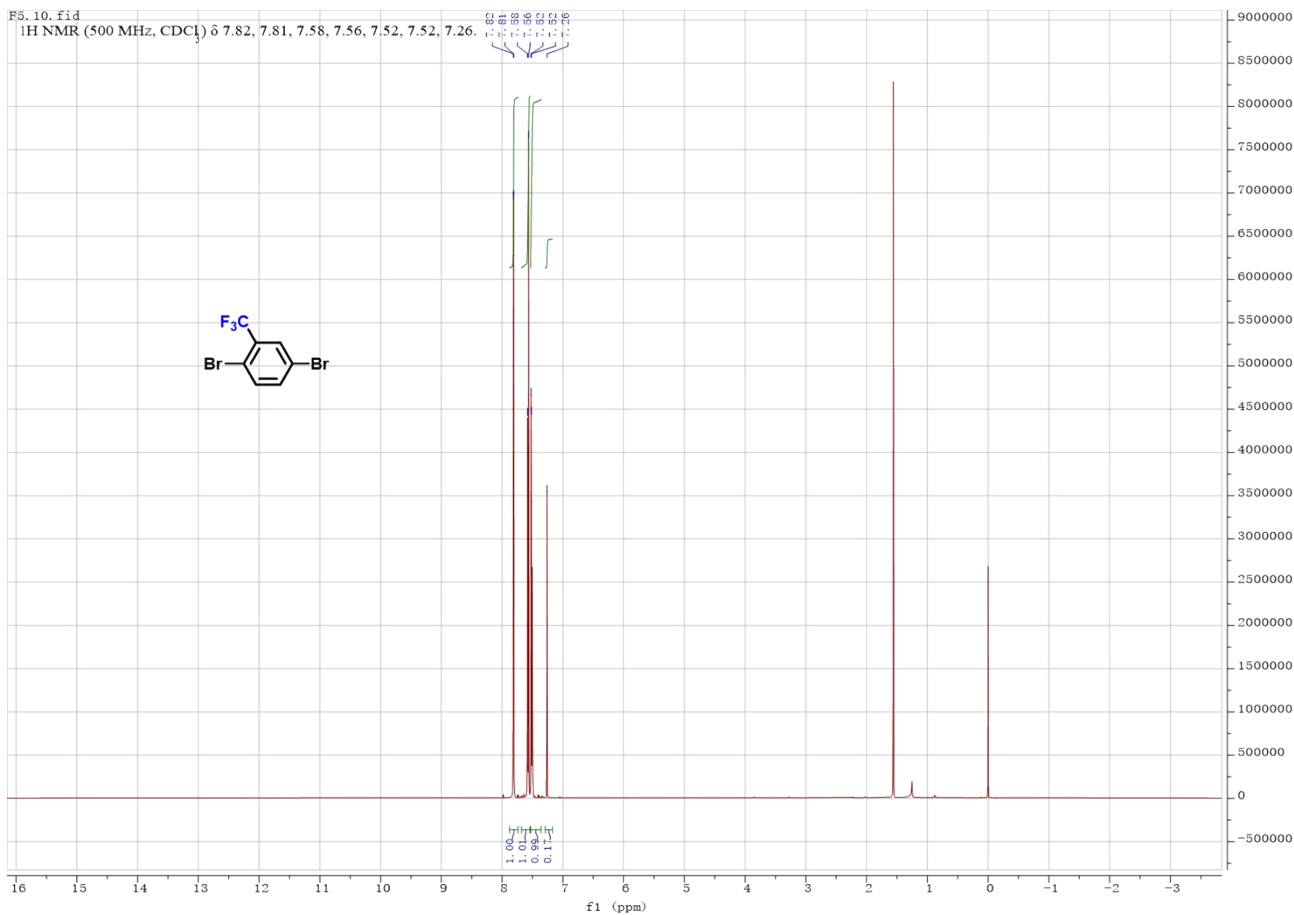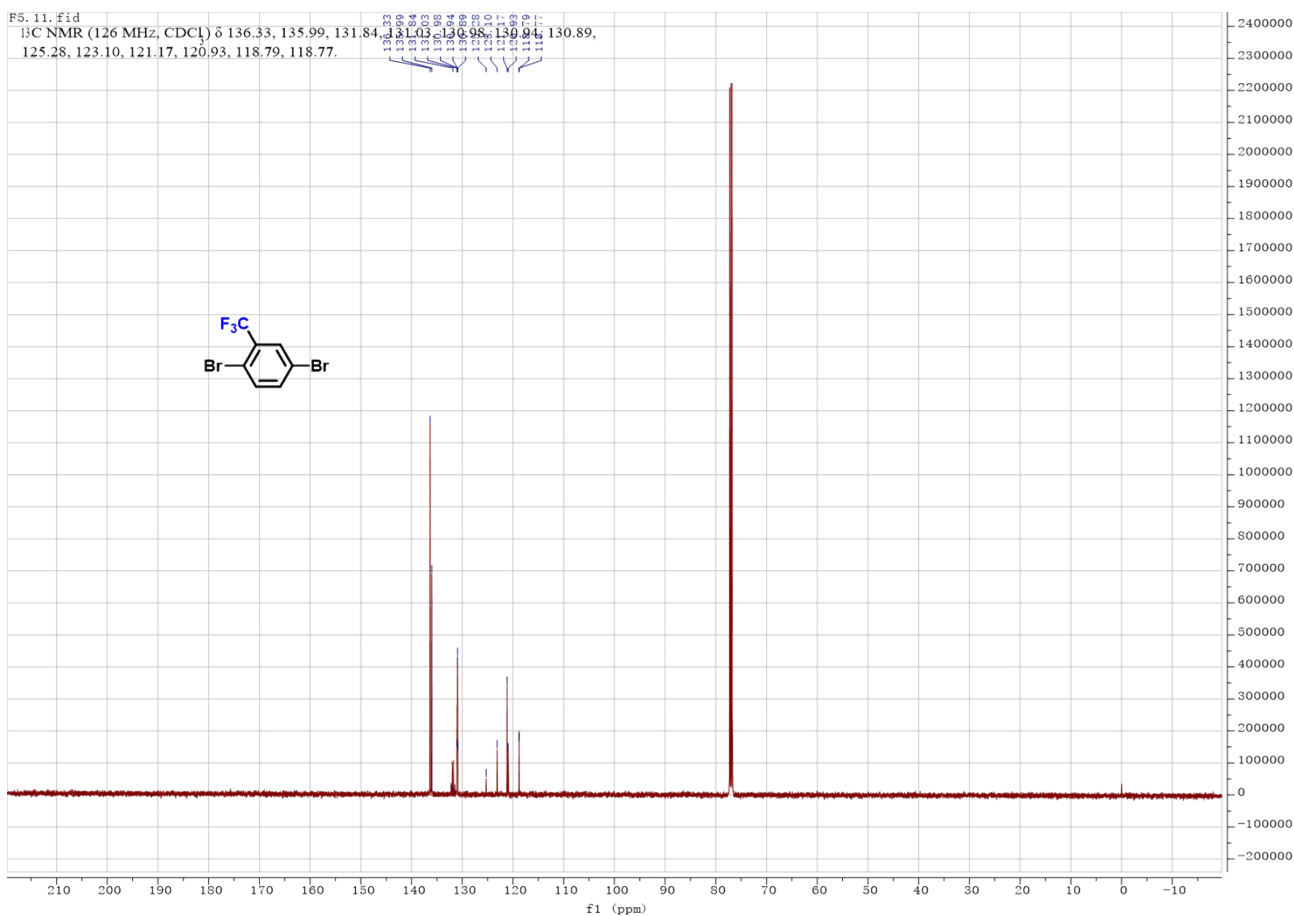

F5\_12.fid  
<sup>19</sup>F NMR (471 MHz, CDCl<sub>3</sub>) δ -63.09.

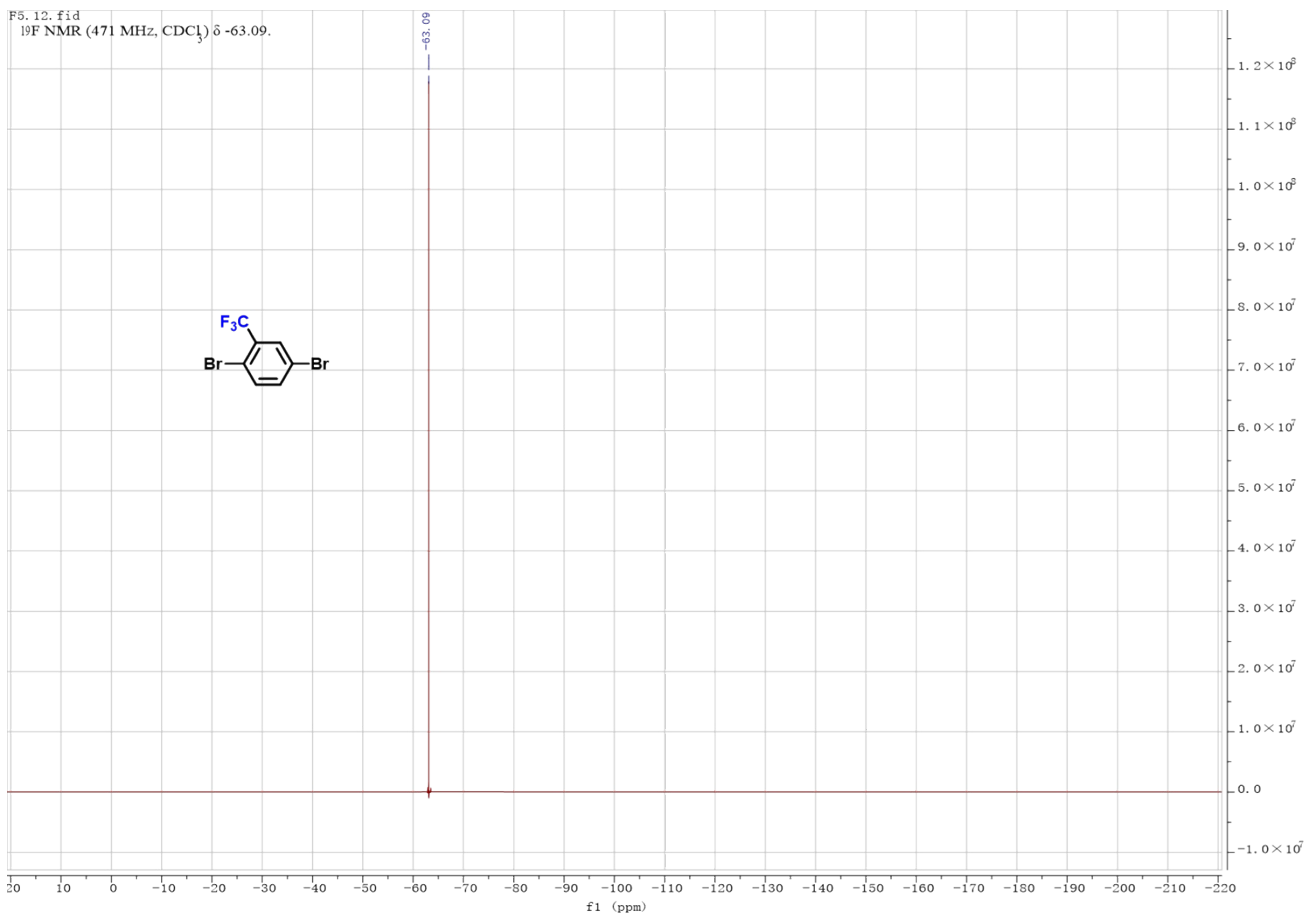

<sup>1</sup>H NMR (500 MHz, CDCl<sub>3</sub>) δ 8.93.

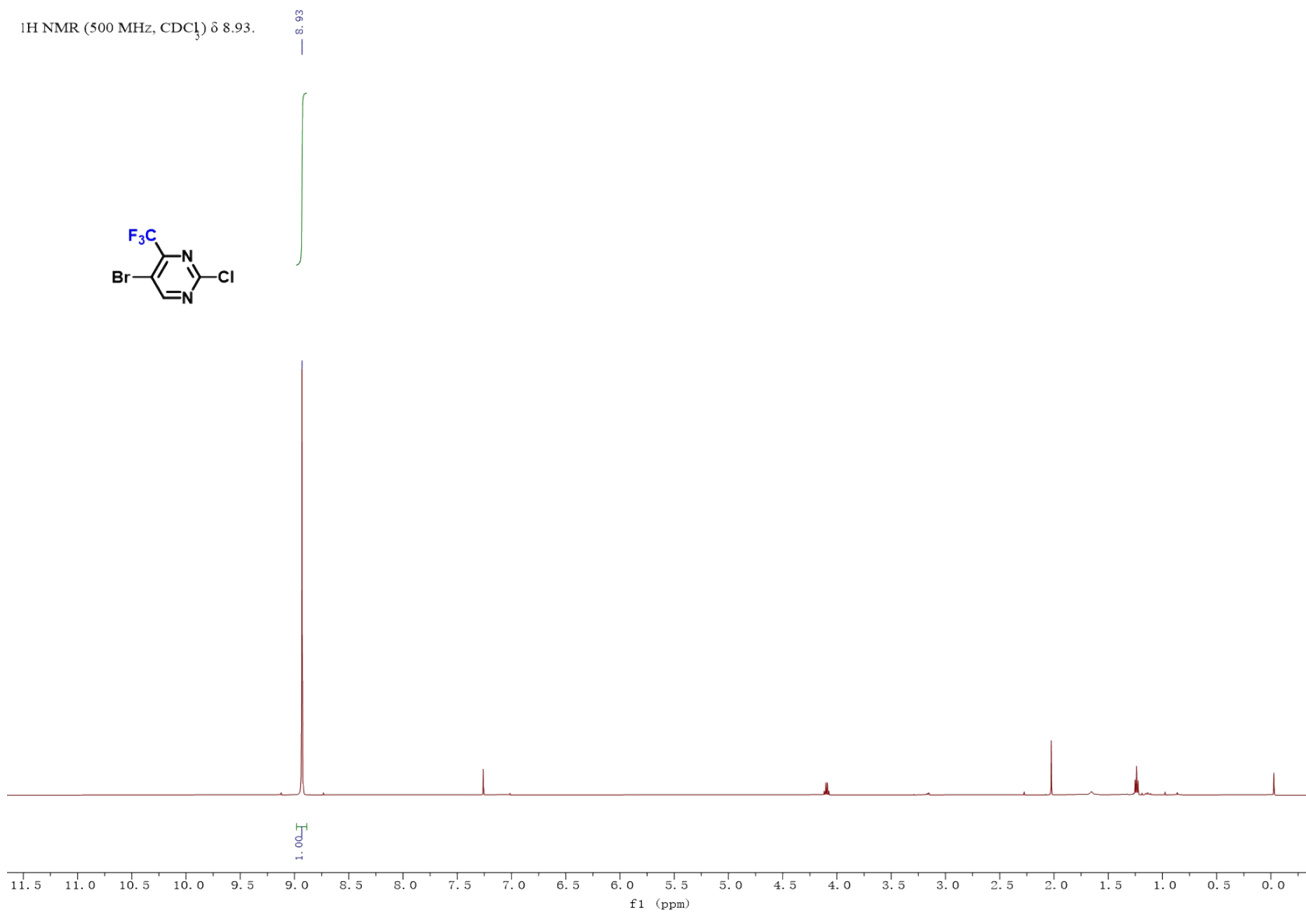

164.56  
159.60  
155.63  
155.33  
155.04  
154.75

122.88  
120.89  
118.97  
118.34

$^{13}\text{C}$  NMR (126 MHz,  $\text{CDCl}_3$ )  $\delta$  164.56, 159.60, 155.63, 155.33, 155.04, 154.75, 122.58, 120.38, 118.17, 115.97, 115.34.

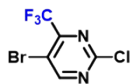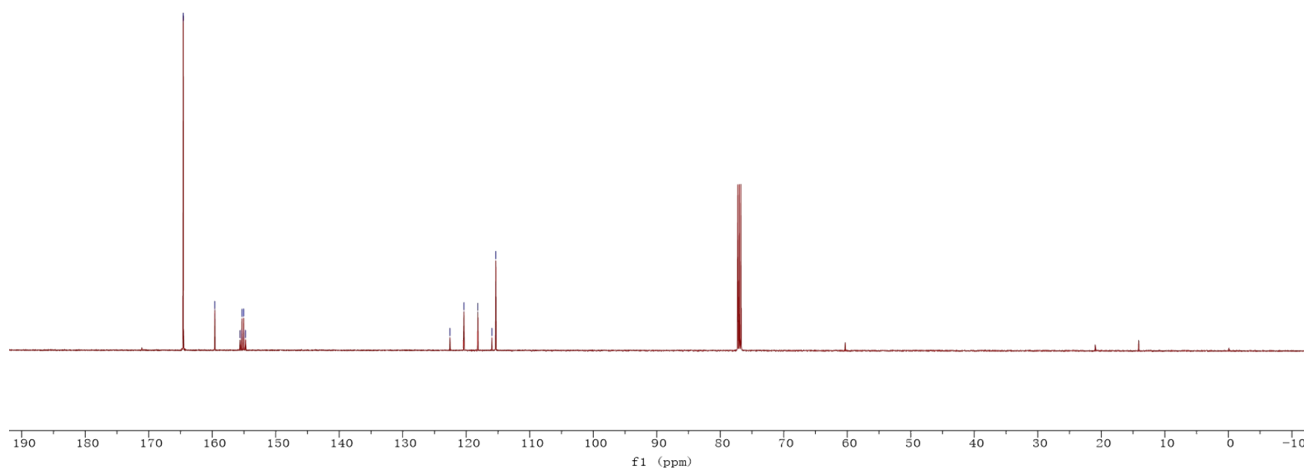

$^{19}\text{F}$  NMR (471 MHz,  $\text{CDCl}_3$ )  $\delta$  -68.20.

-68.20

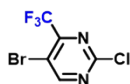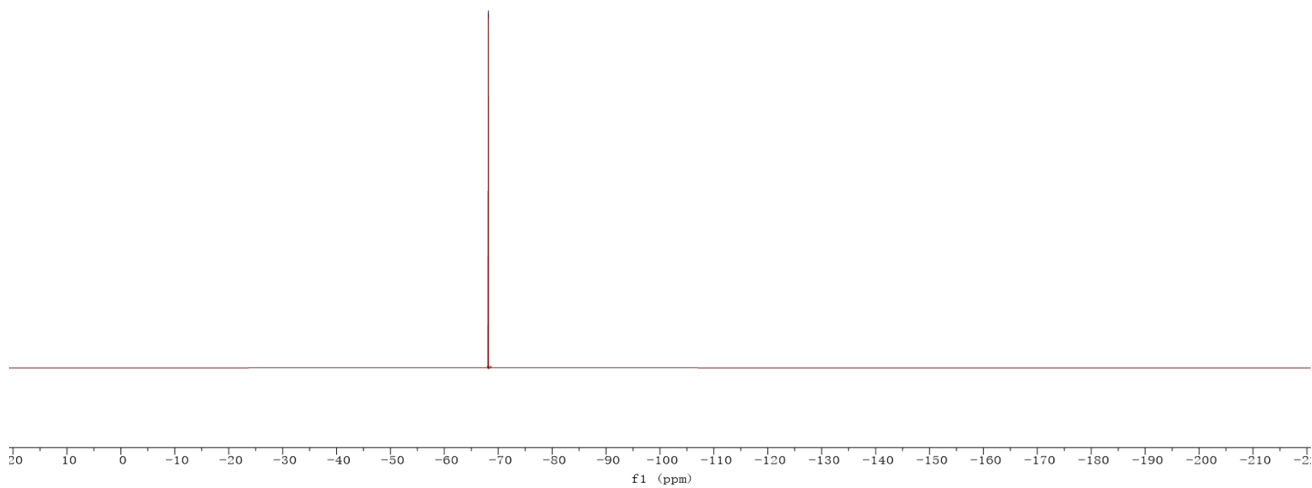

F9\_10.fid

<sup>1</sup>H NMR (500 MHz, CDCl<sub>3</sub>) δ 8.52, 7.26, 5.40.

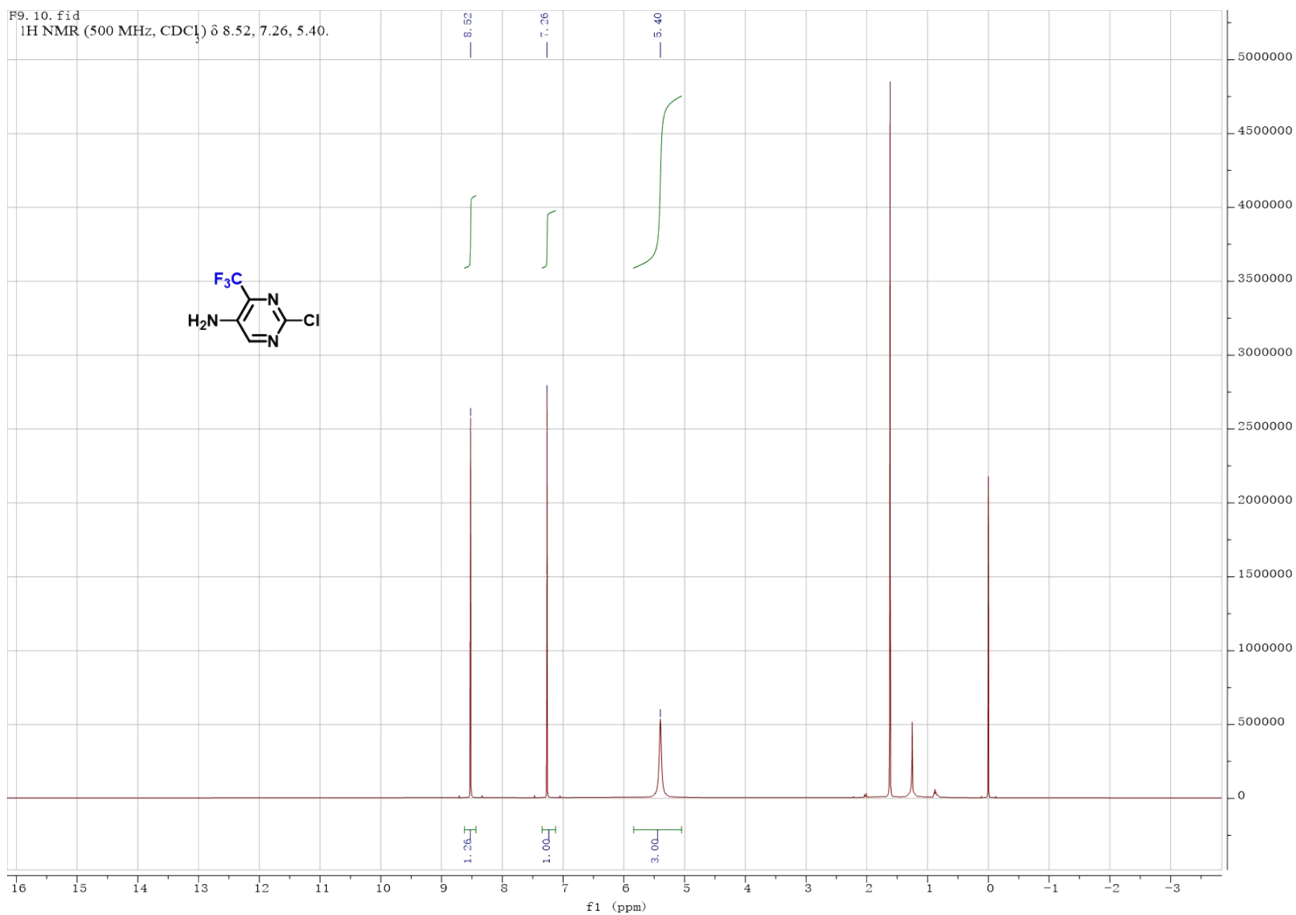

F9\_11.fid

<sup>13</sup>C NMR (126 MHz, CDCl<sub>3</sub>) δ 163.32, 161.00, 153.64, 153.36, 153.36, 121.08, 118.88, 102.99.

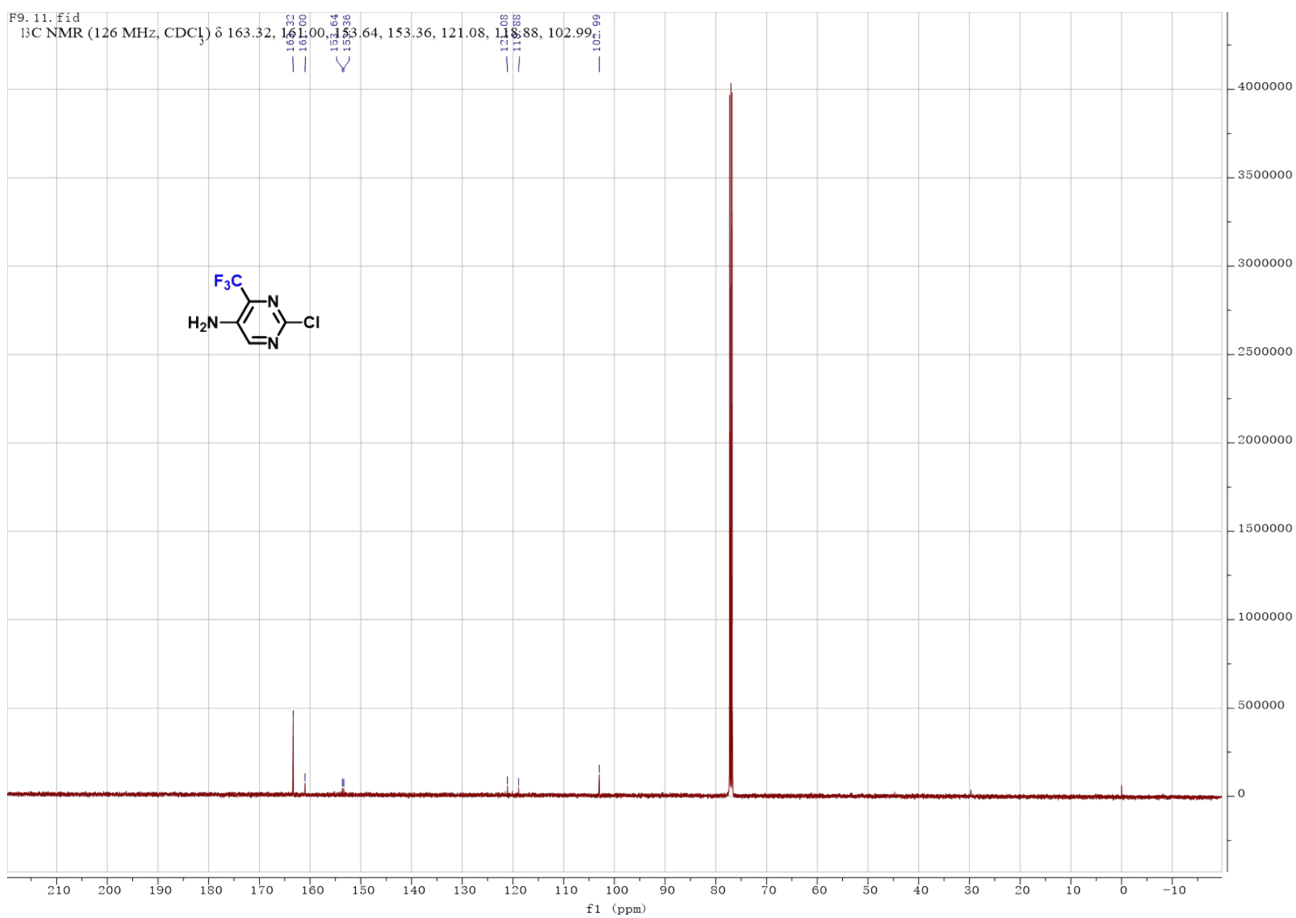

F9\_12.fid  
<sup>19</sup>F NMR (471 MHz, CDCl<sub>3</sub>) δ -68.48.

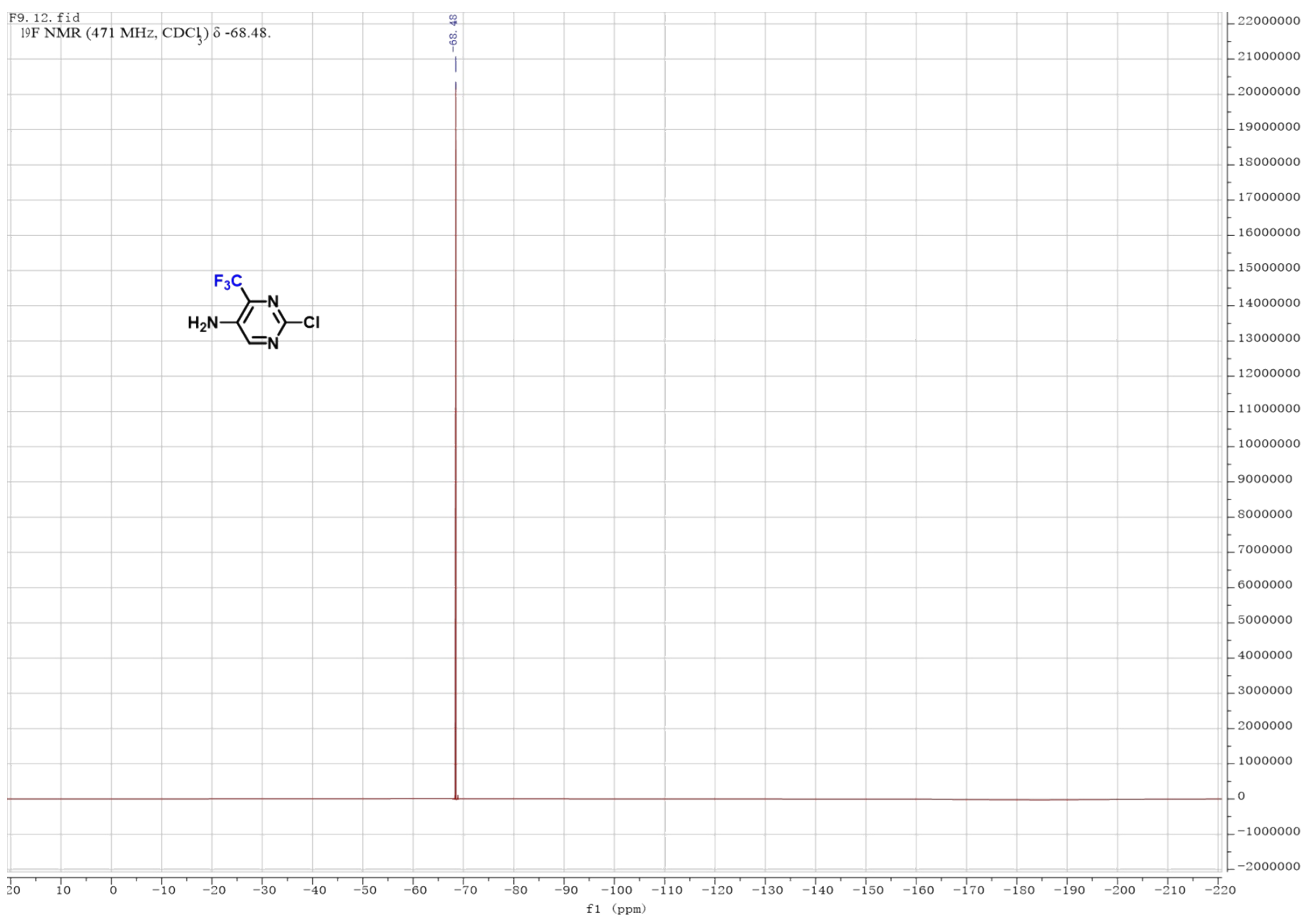

9.26  
9.25

2.79  
2.79

<sup>1</sup>H NMR (500 MHz, DMSO) δ 9.26, 9.25, 2.79, 2.79.

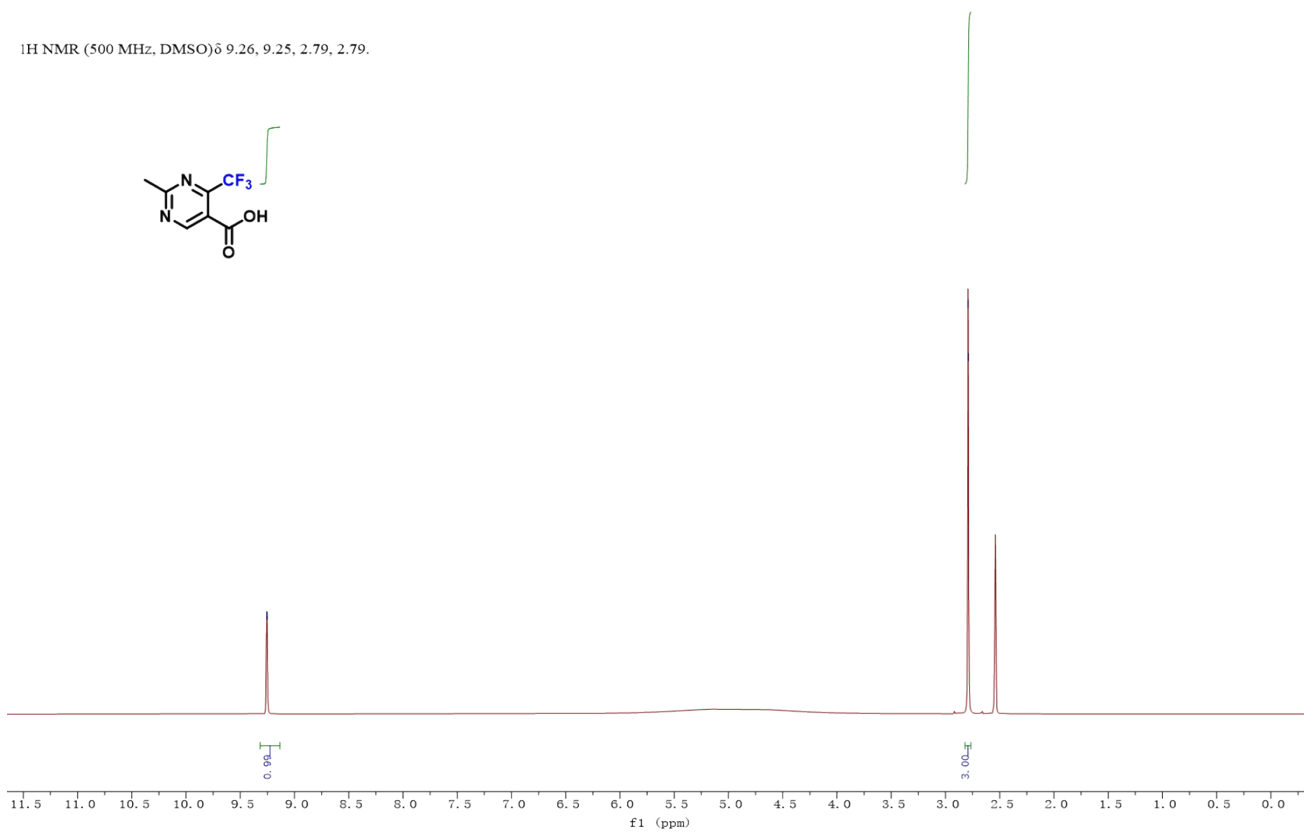

170.05  
165.01  
160.44  
151.89  
151.61  
151.32  
151.04

123.98  
122.82  
121.78  
119.59  
117.39

26.02  
26.00

<sup>13</sup>C NMR (126 MHz, DMSO) δ 170.05, 165.01, 160.44, 151.89, 151.61, 151.32, 151.04, 123.98, 122.82, 121.78, 119.59, 117.39, 26.02, 26.00.

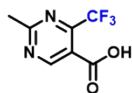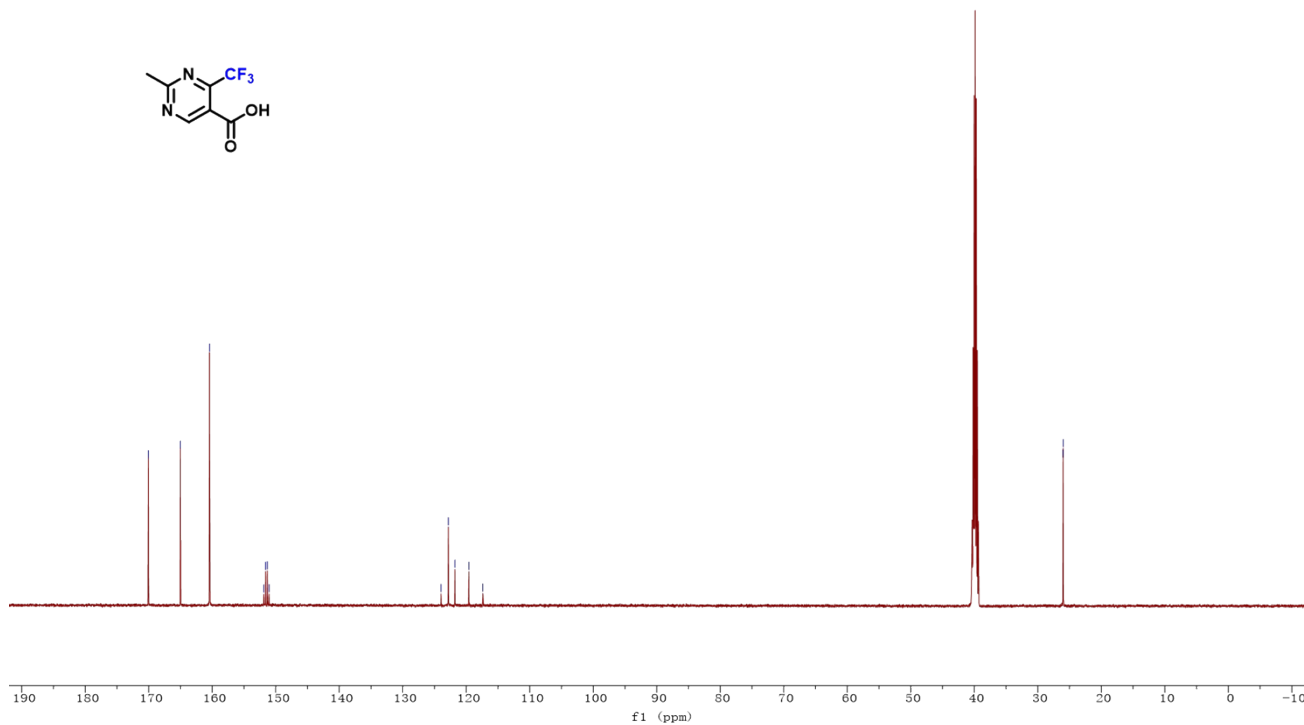

<sup>19</sup>F NMR (471 MHz, DMSO) δ -65.37, -65.38, -65.39, -65.41.

-65.37  
-65.38  
-65.39  
-65.41

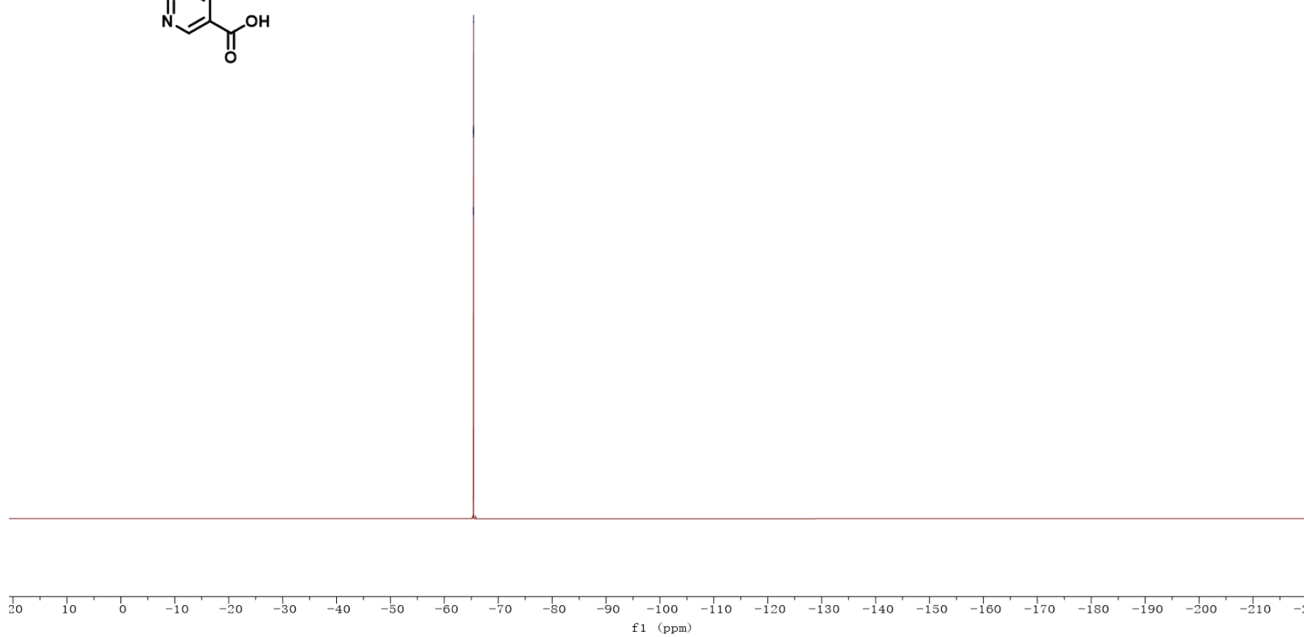

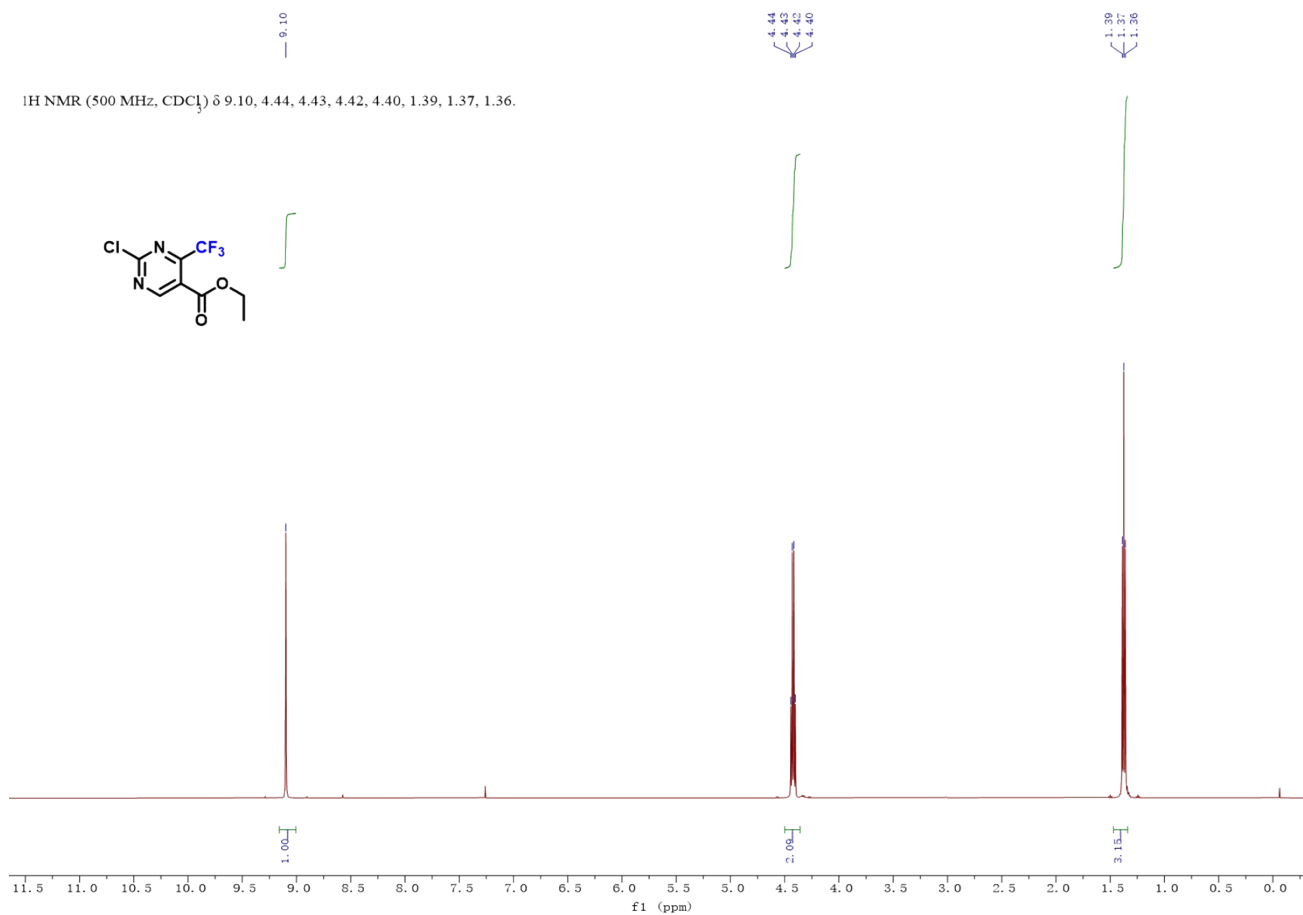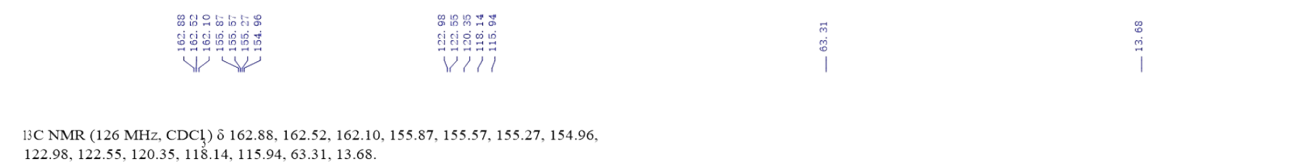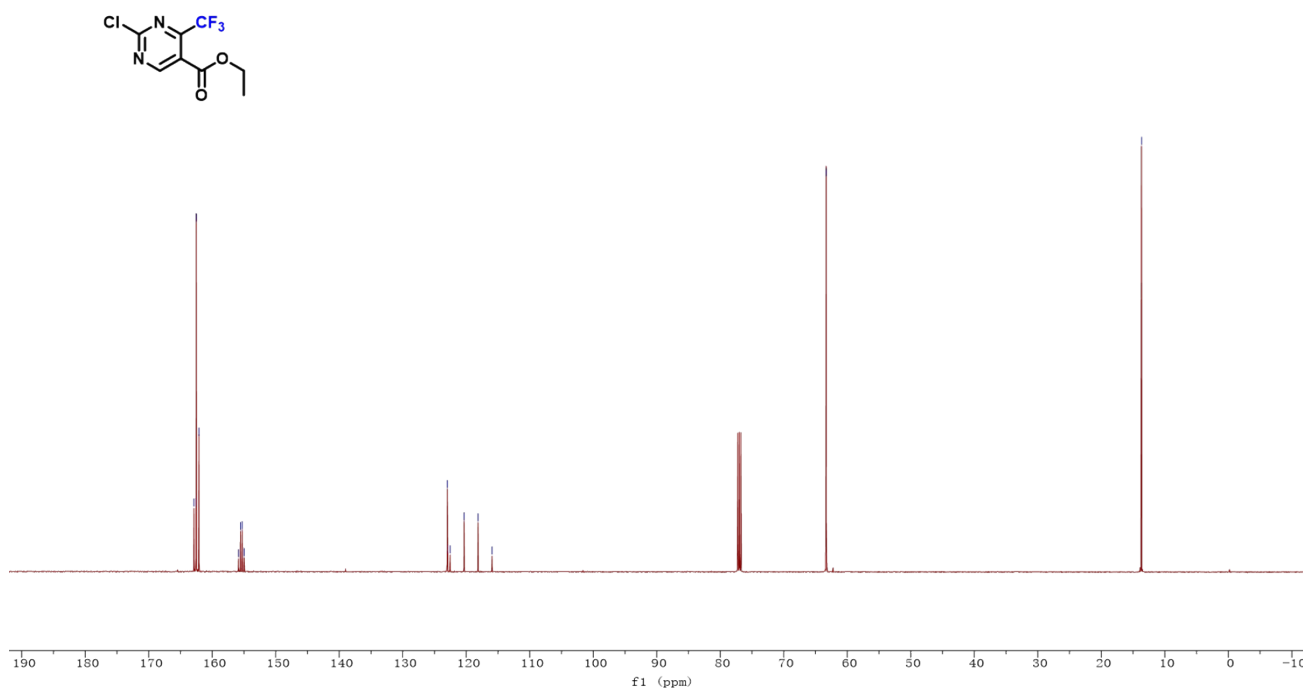

$^{19}\text{F}$  NMR (471 MHz,  $\text{CDCl}_3$ )  $\delta$  -66.37.

-66.37

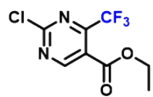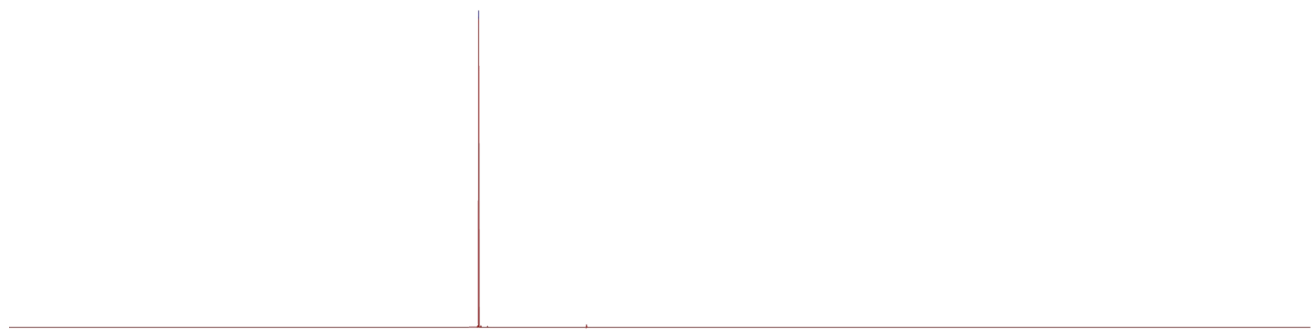

20 10 0 -10 -20 -30 -40 -50 -60 -70 -80 -90 -100 -110 -120 -130 -140 -150 -160 -170 -180 -190 -200 -210 -2

f1 (ppm)

F7\_10.fid  
 $^1\text{H}$  NMR (500 MHz,  $\text{CDCl}_3$ )  $\delta$  10.57, 7.89, 7.42, 7.41, 7.26.

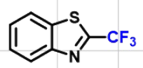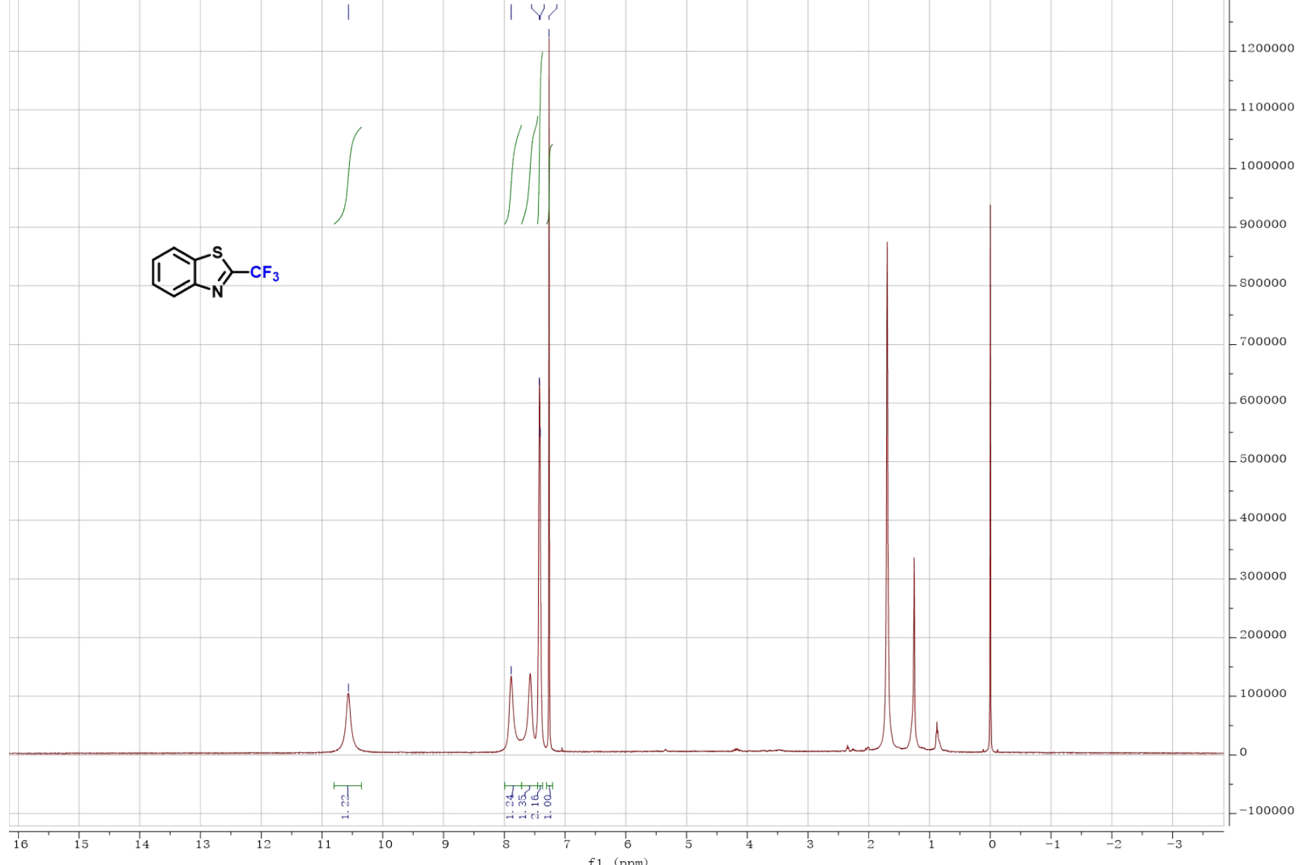

F7. 11. fid  
13C NMR (126 MHz, CDCl<sub>3</sub>) δ 140.81, 140.49, 125.75, 124.02, 119.82, 117.67.

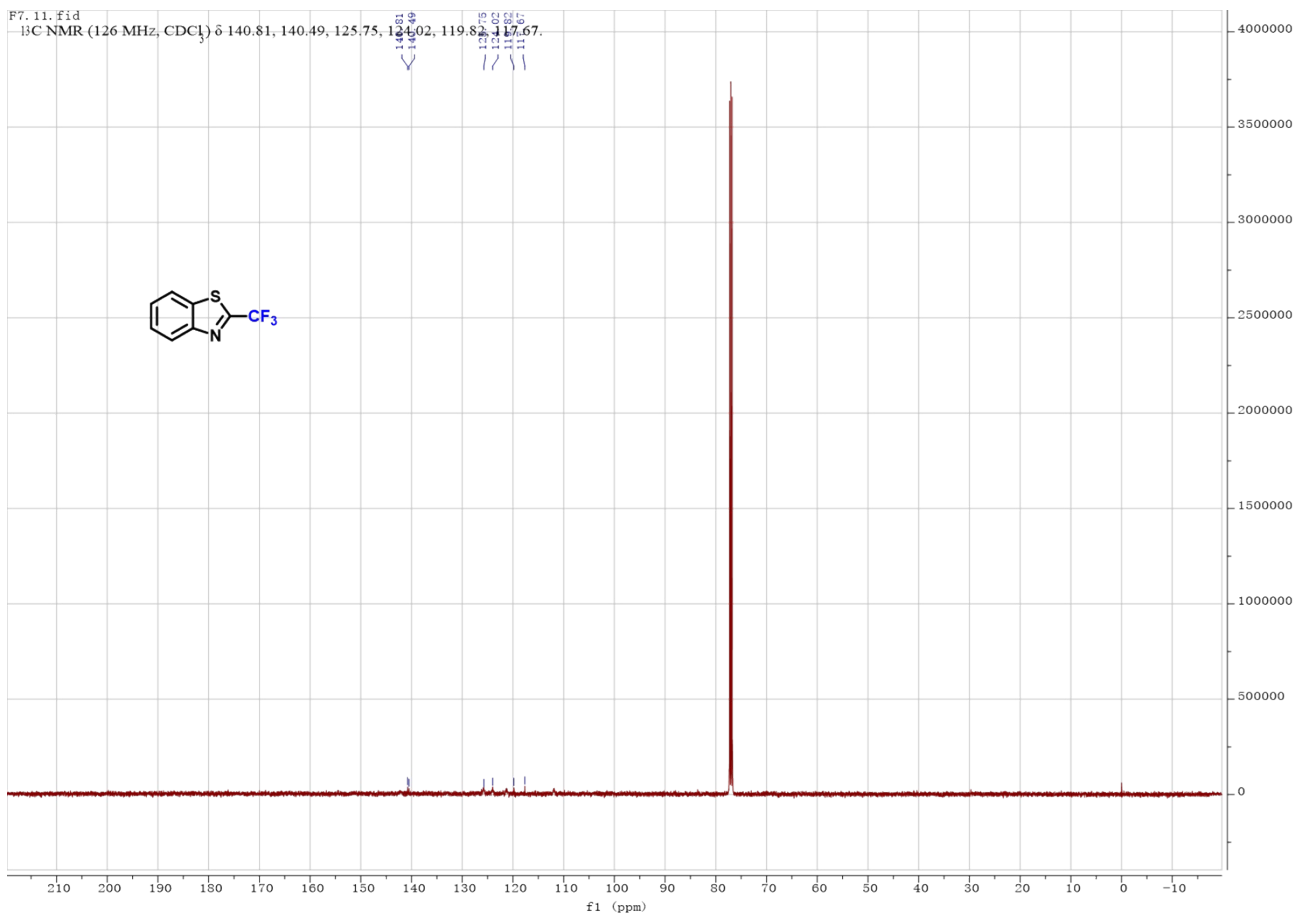

F7. 12. fid  
19F NMR (471 MHz, CDCl<sub>3</sub>) δ -64.14.

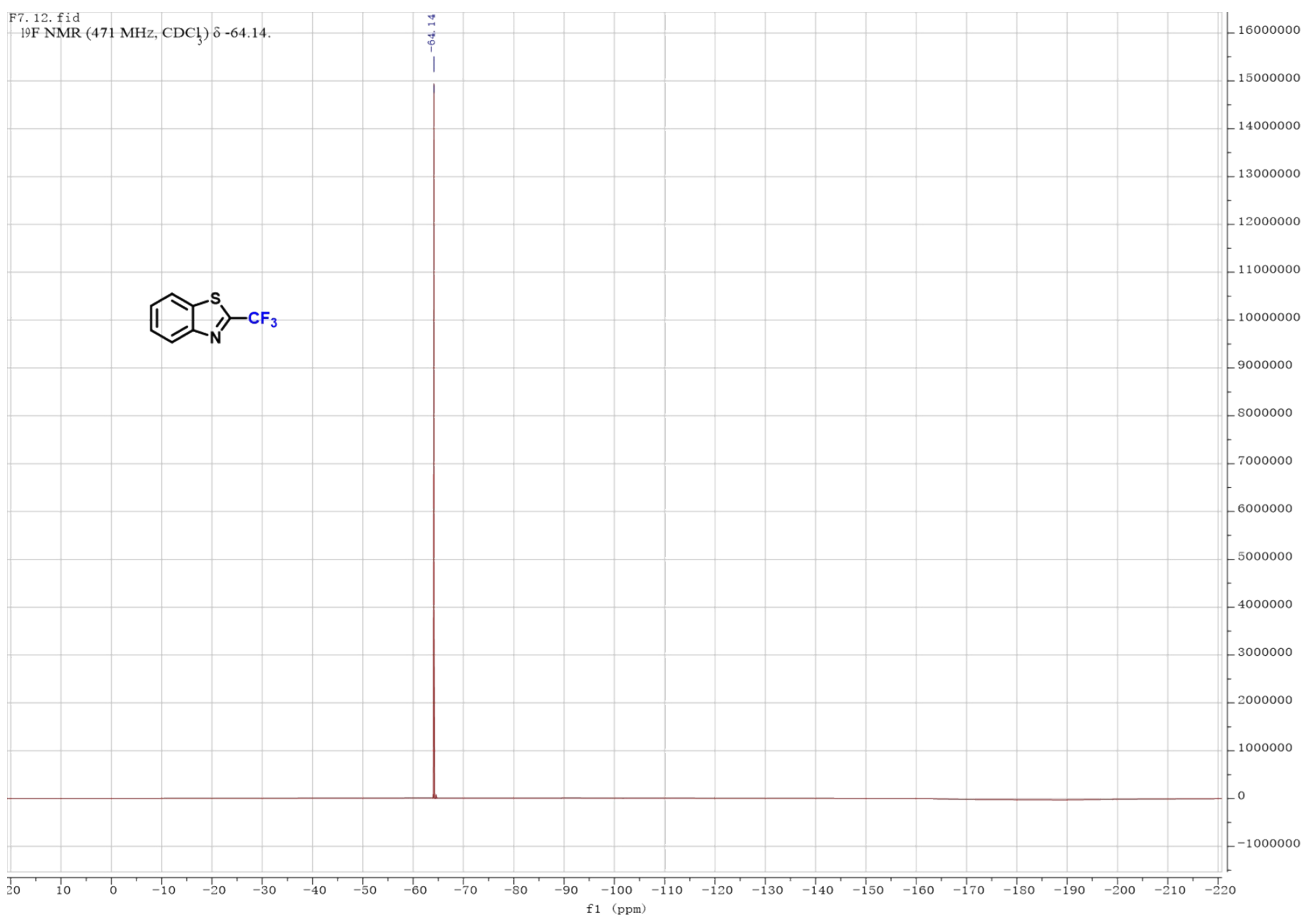

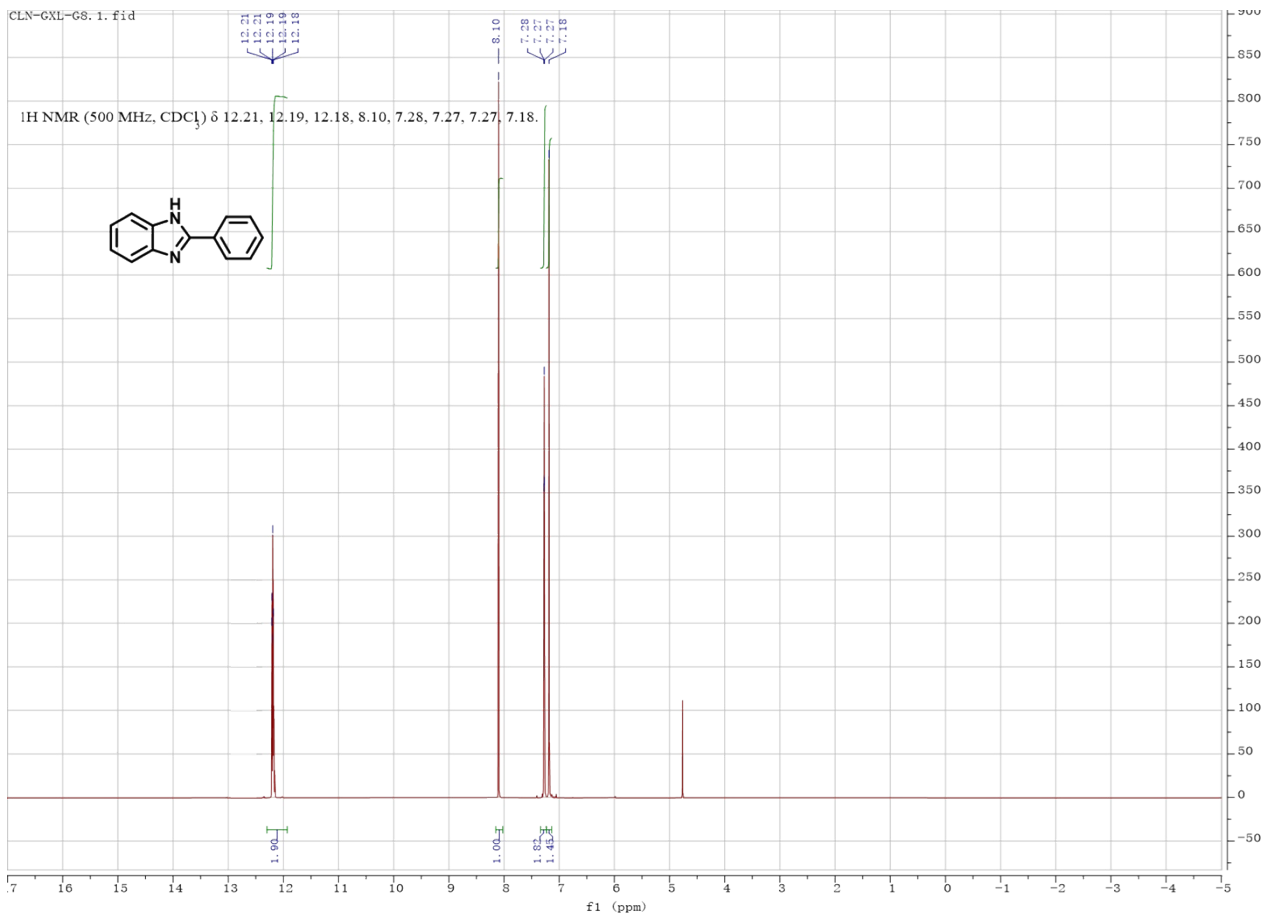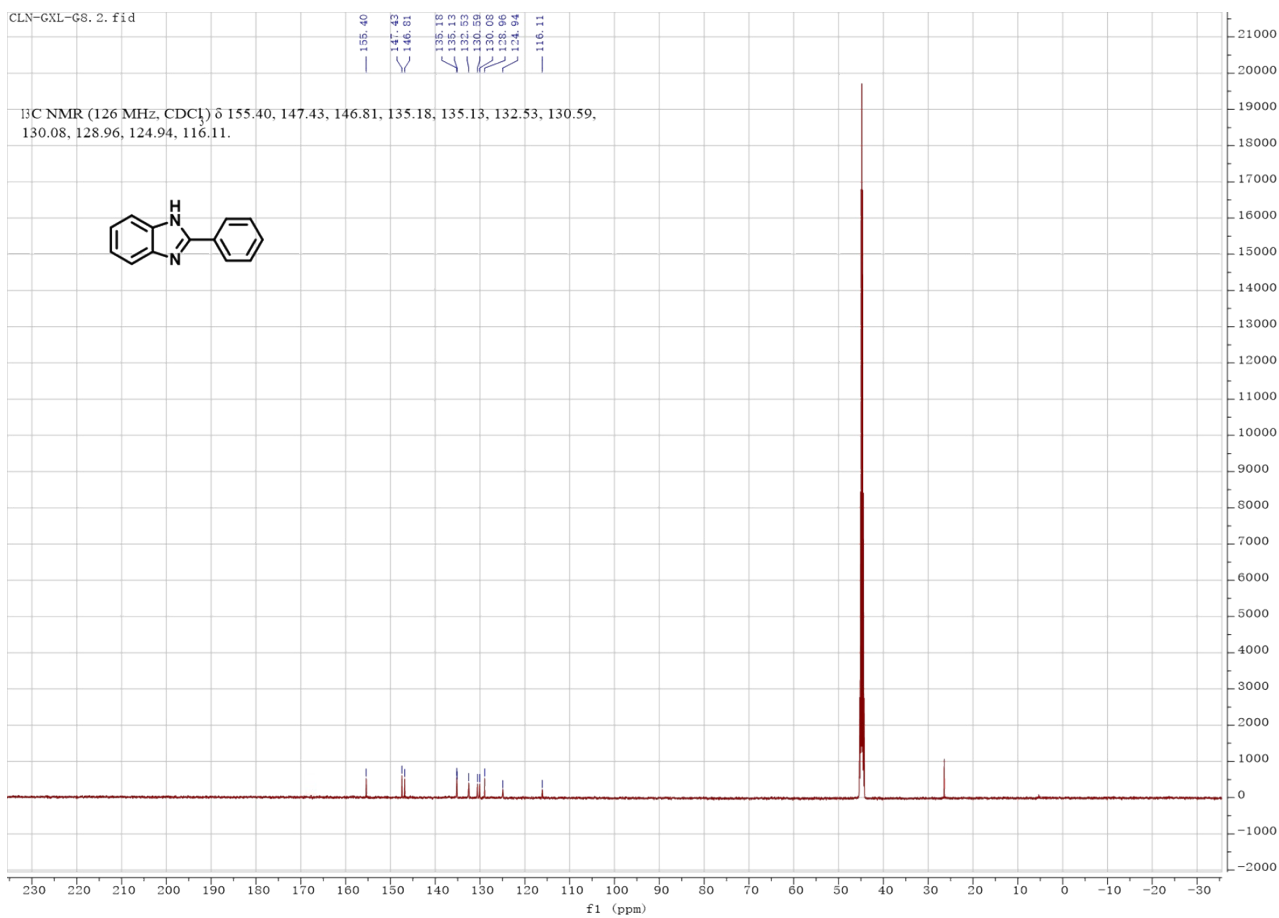

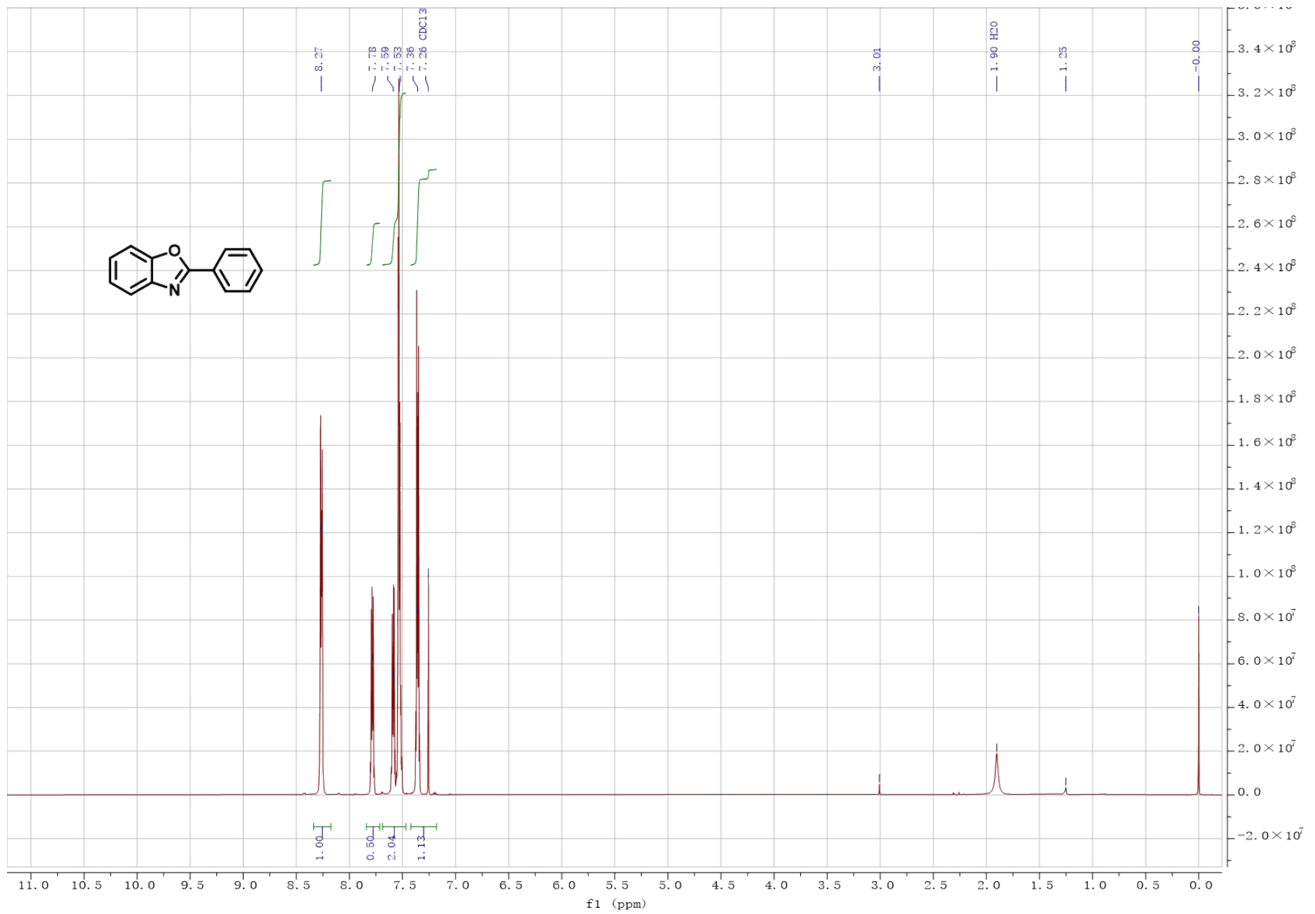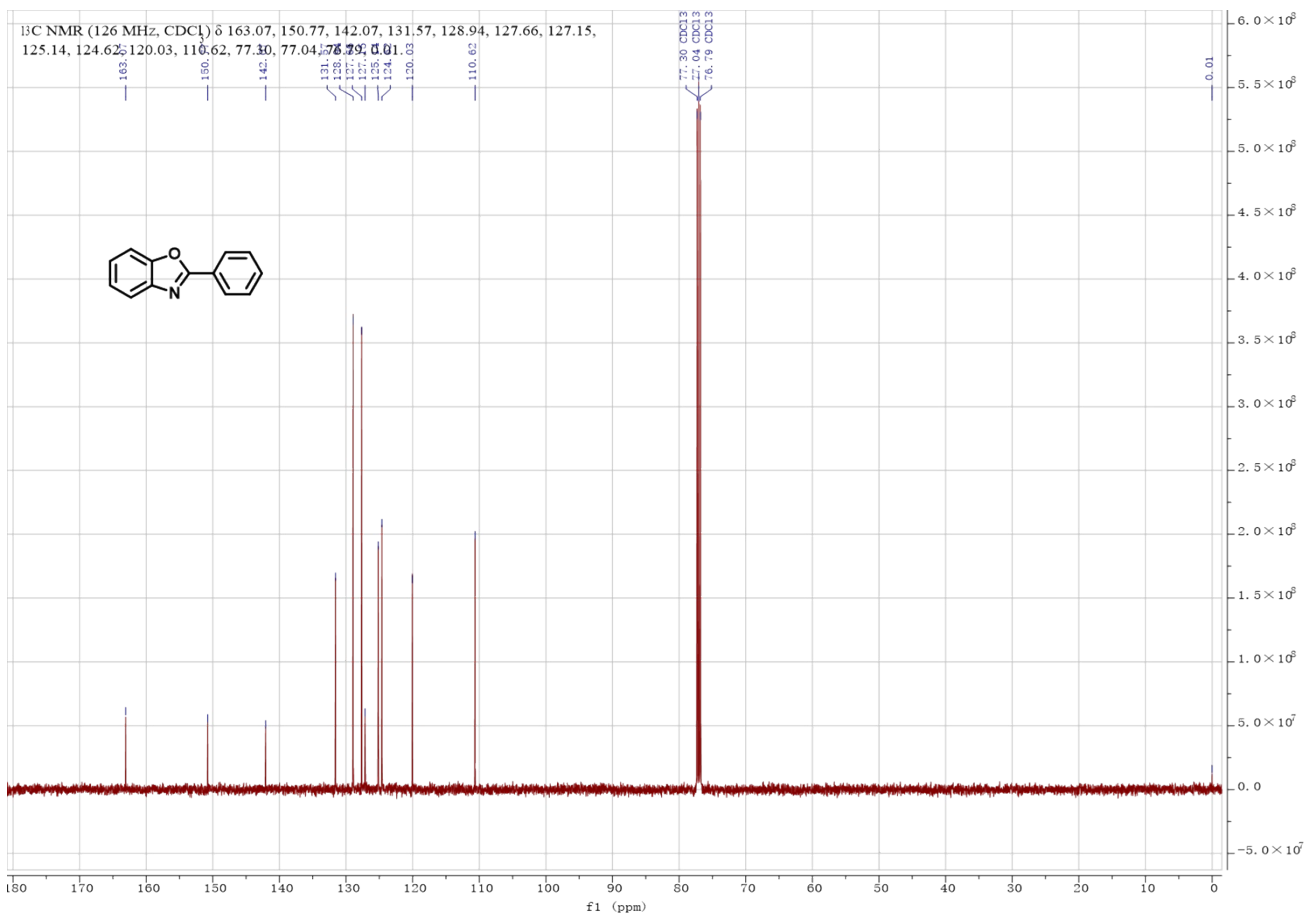

CLN-GXL-G4. 1. fid

$^1\text{H NMR}$  (500 MHz, DMSO)  $\delta$  8.12, 8.11, 7.80, 7.46, 7.46, 7.45, 7.44, 7.43, 7.42.

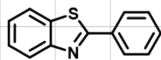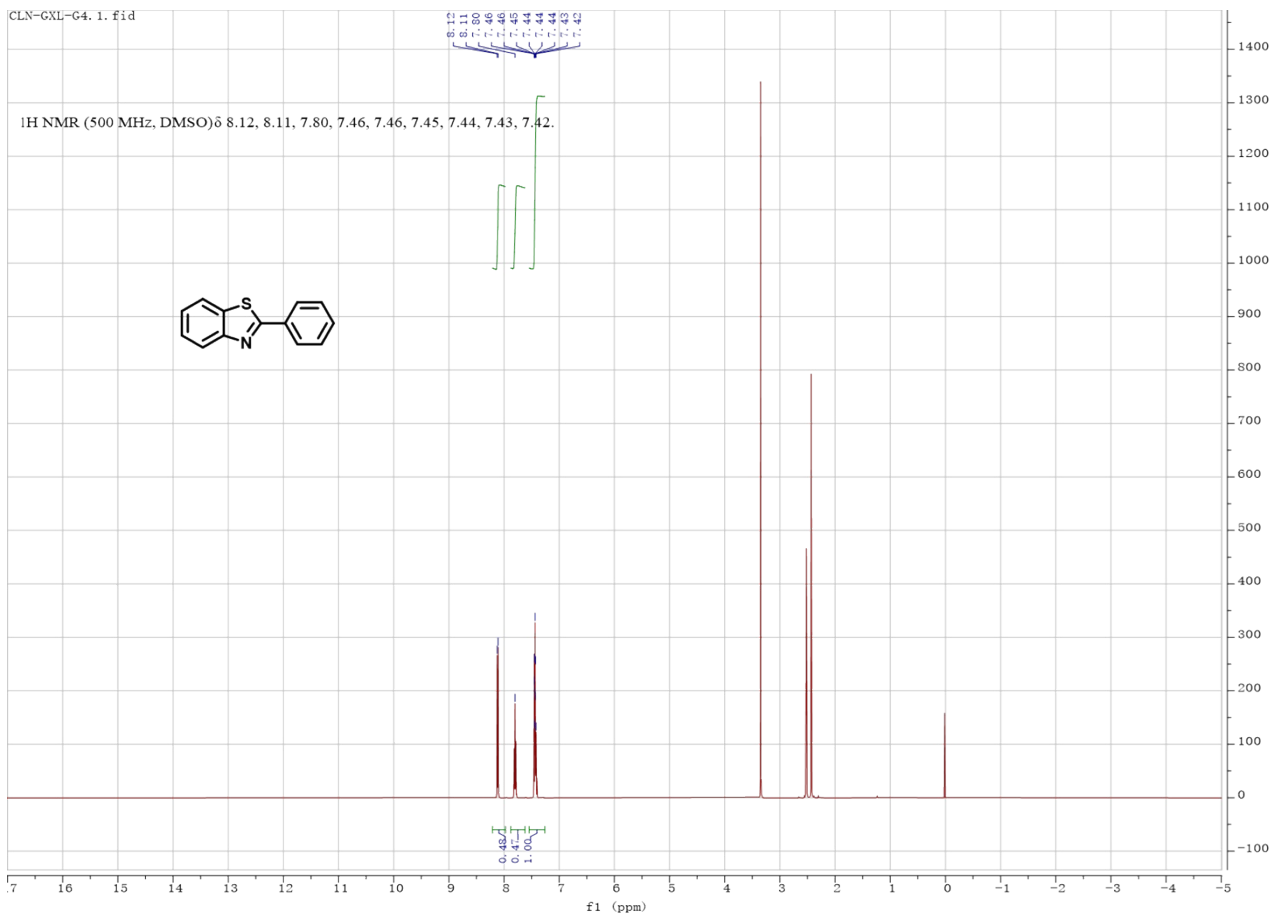

CLN-GXL-G4. 2. fid

$^{13}\text{C NMR}$  (126 MHz, DMSO)  $\delta$  162.95, 150.64, 142.68, 142.06, 130.42, 127.76, 125.83, 125.32, 124.21, 120.18, 111.35.

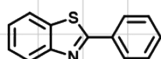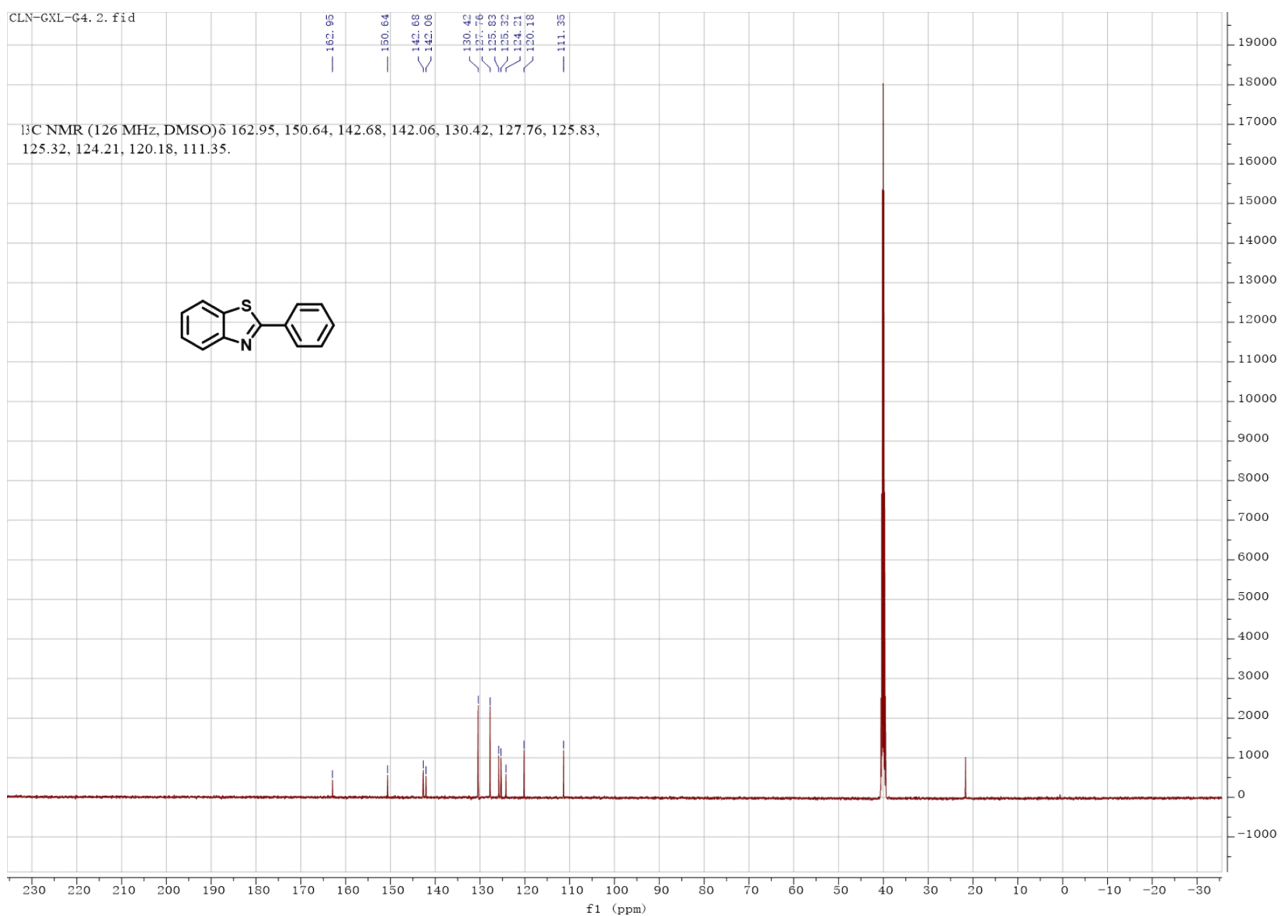

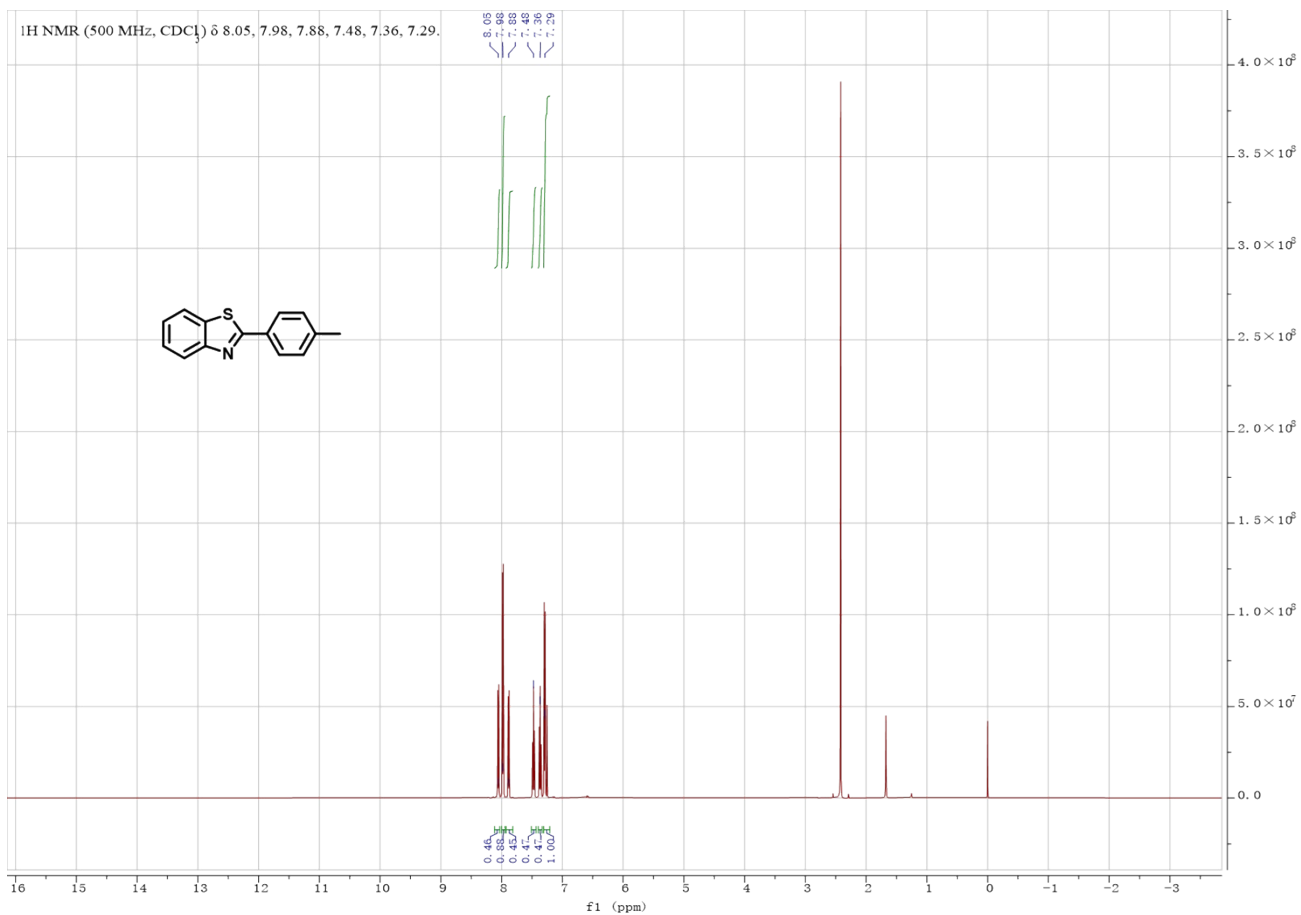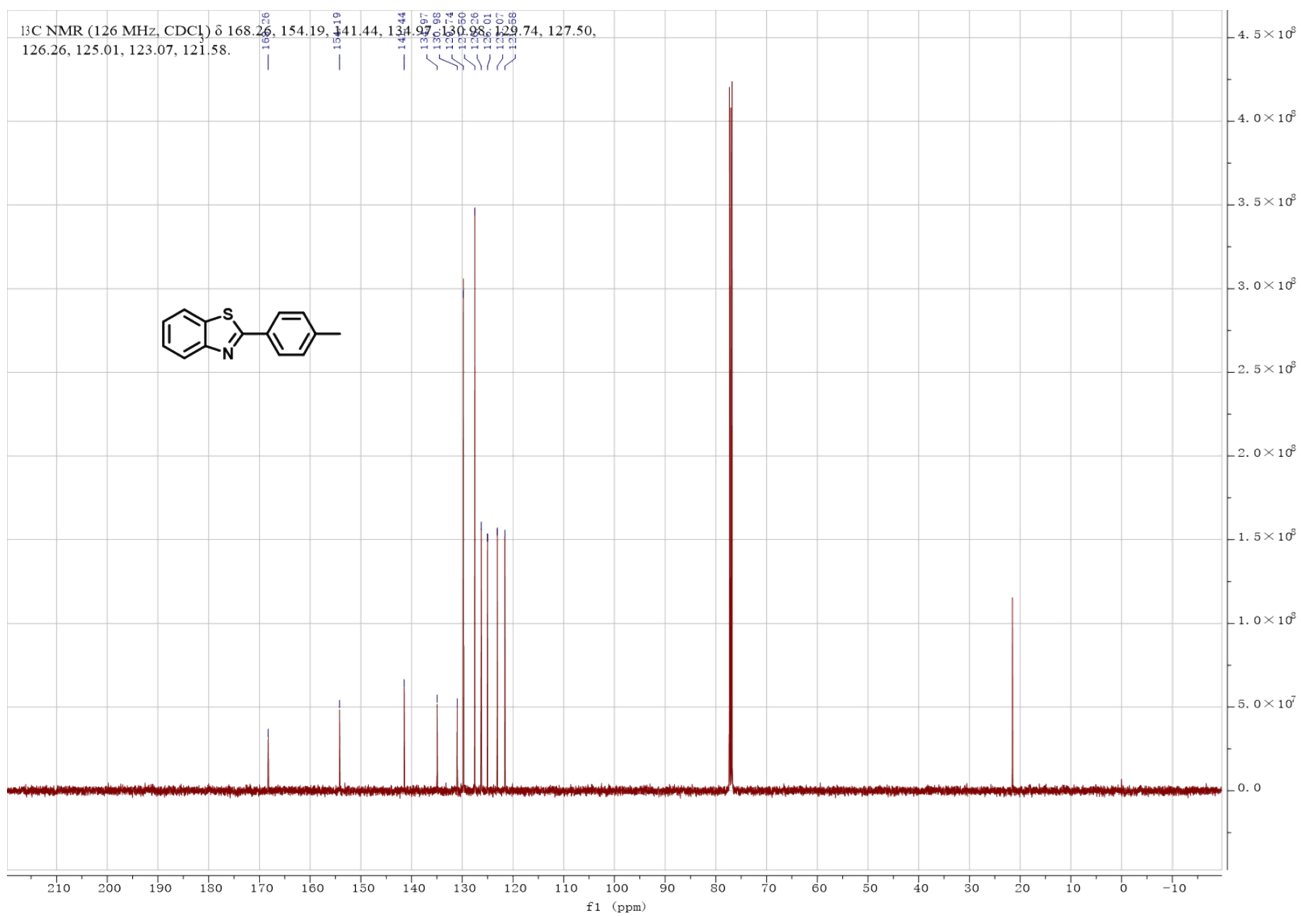

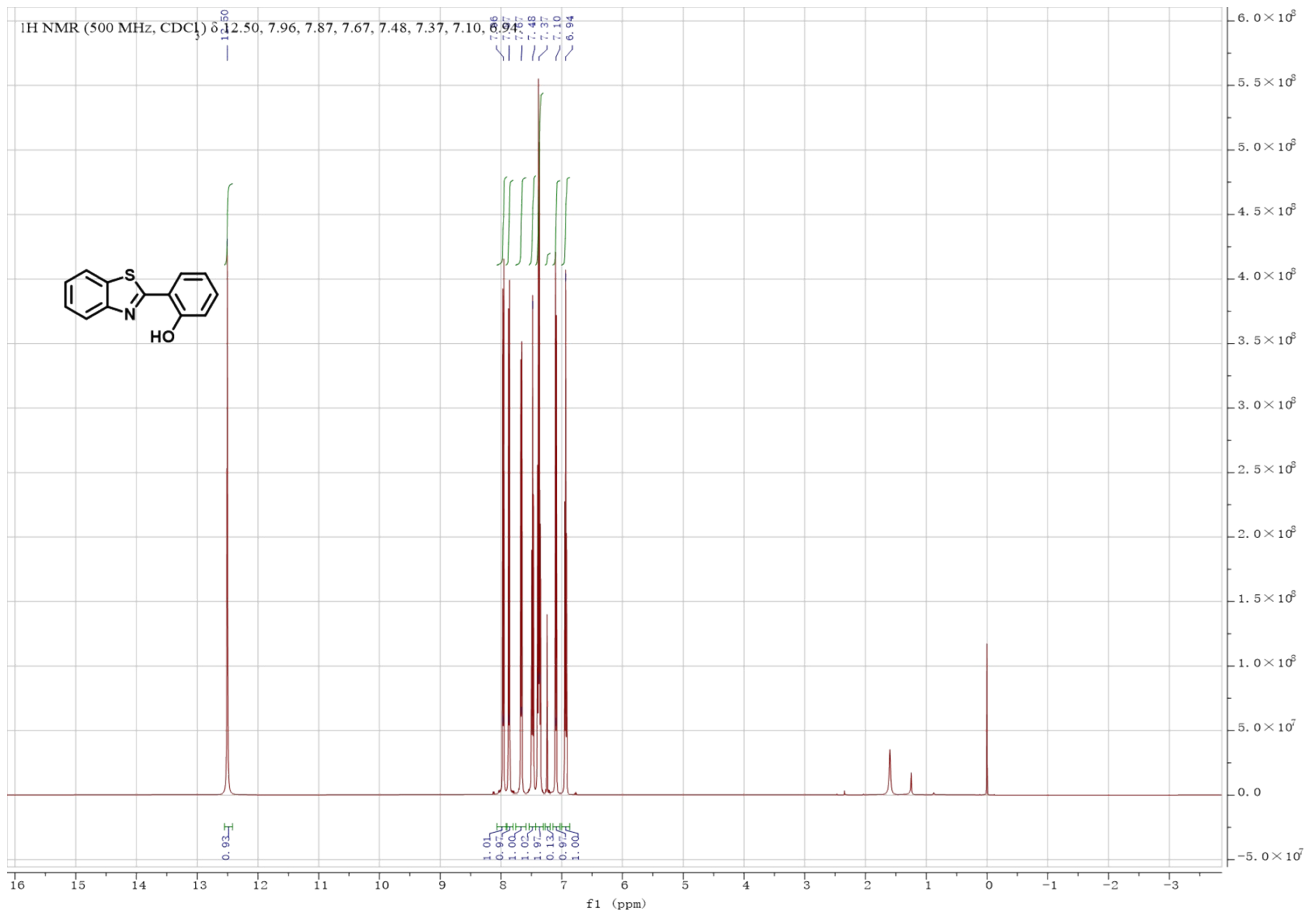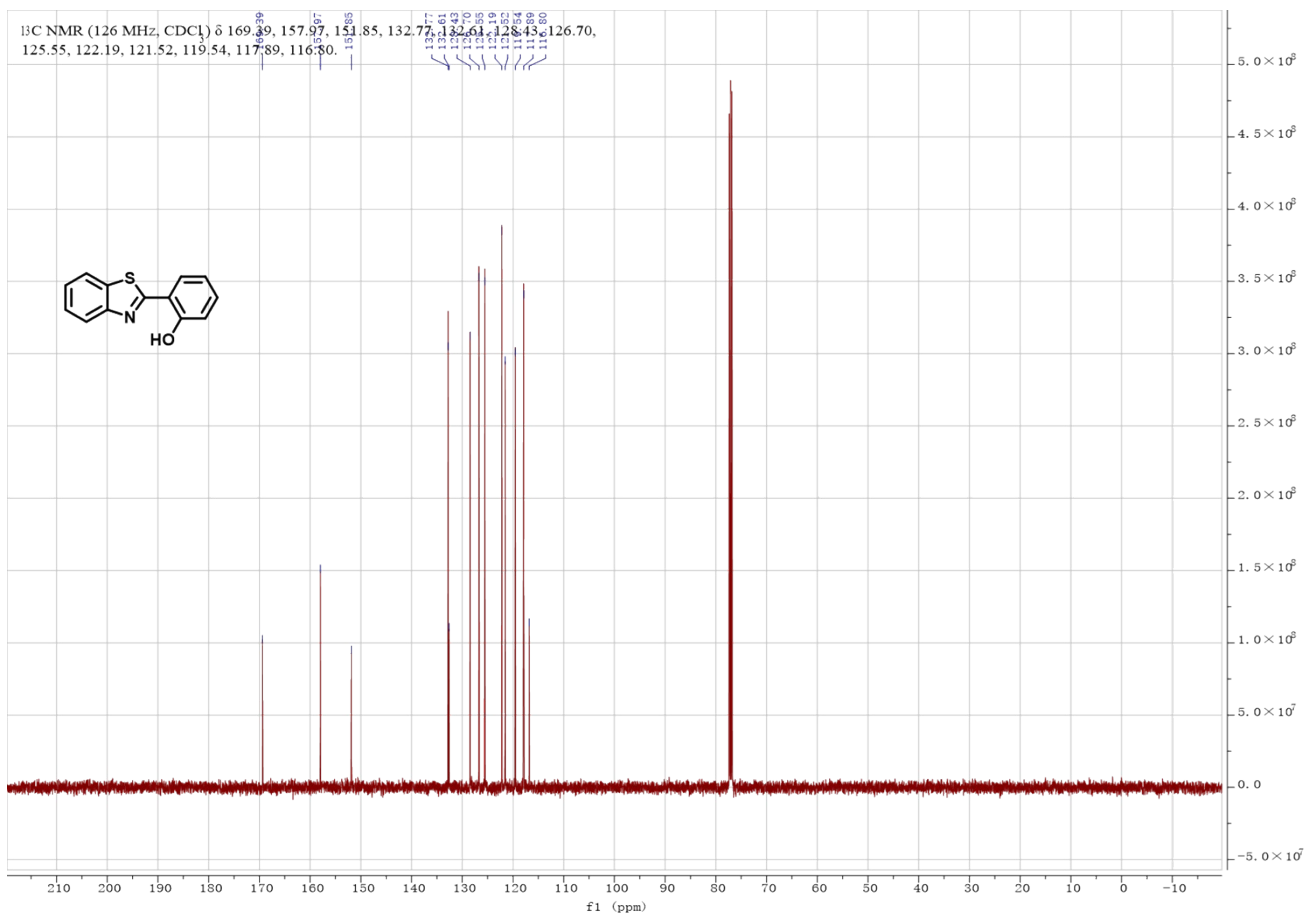

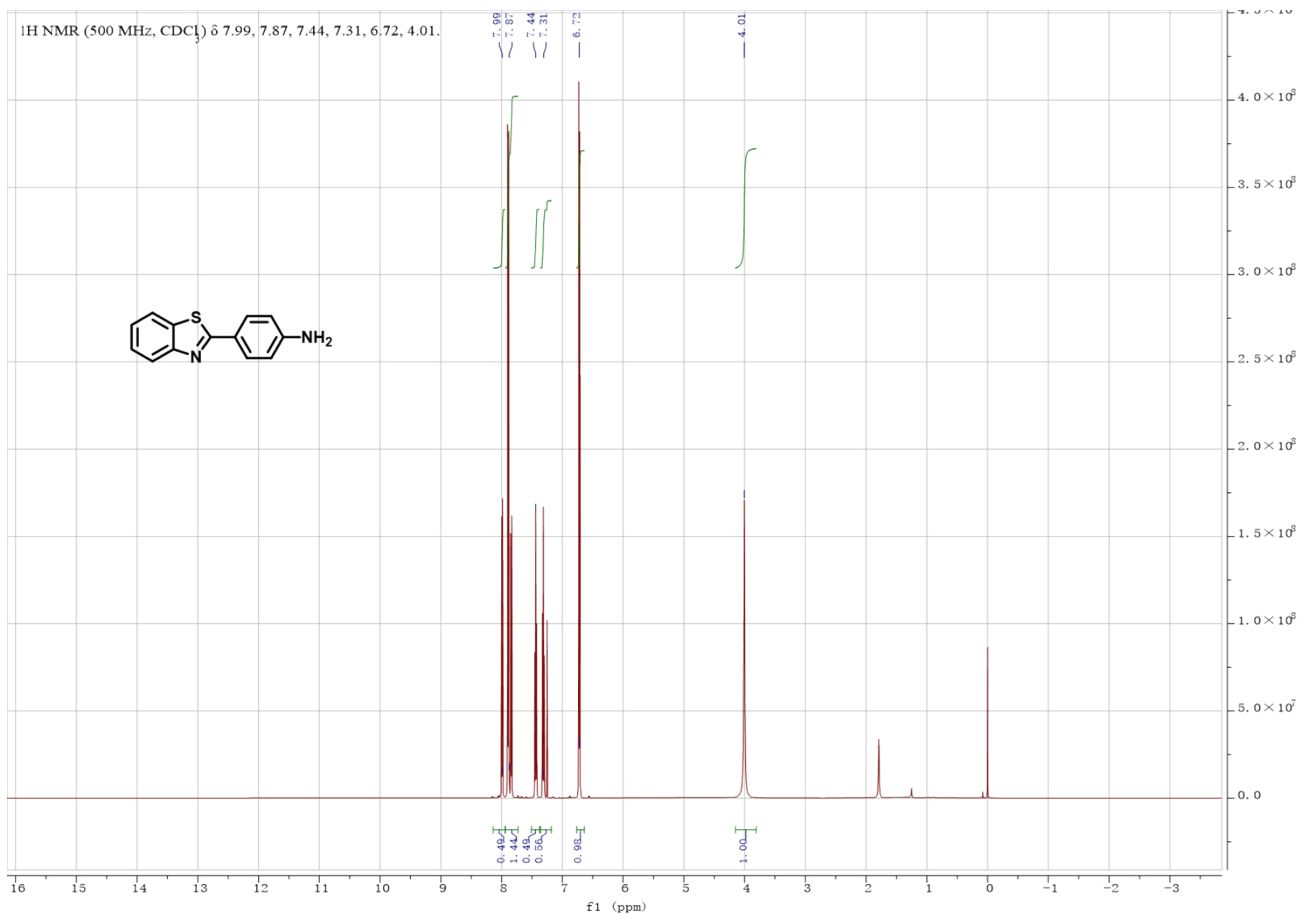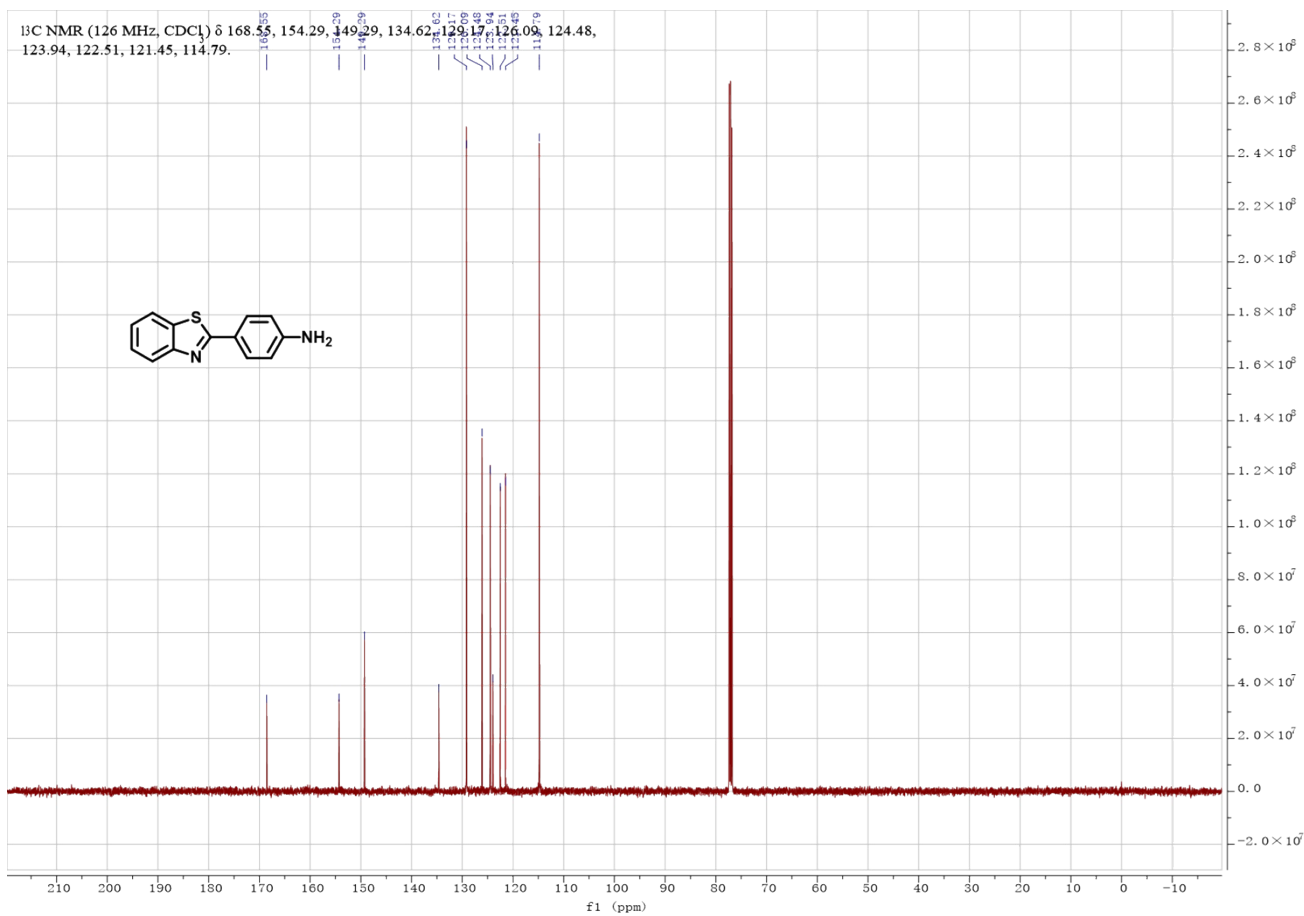

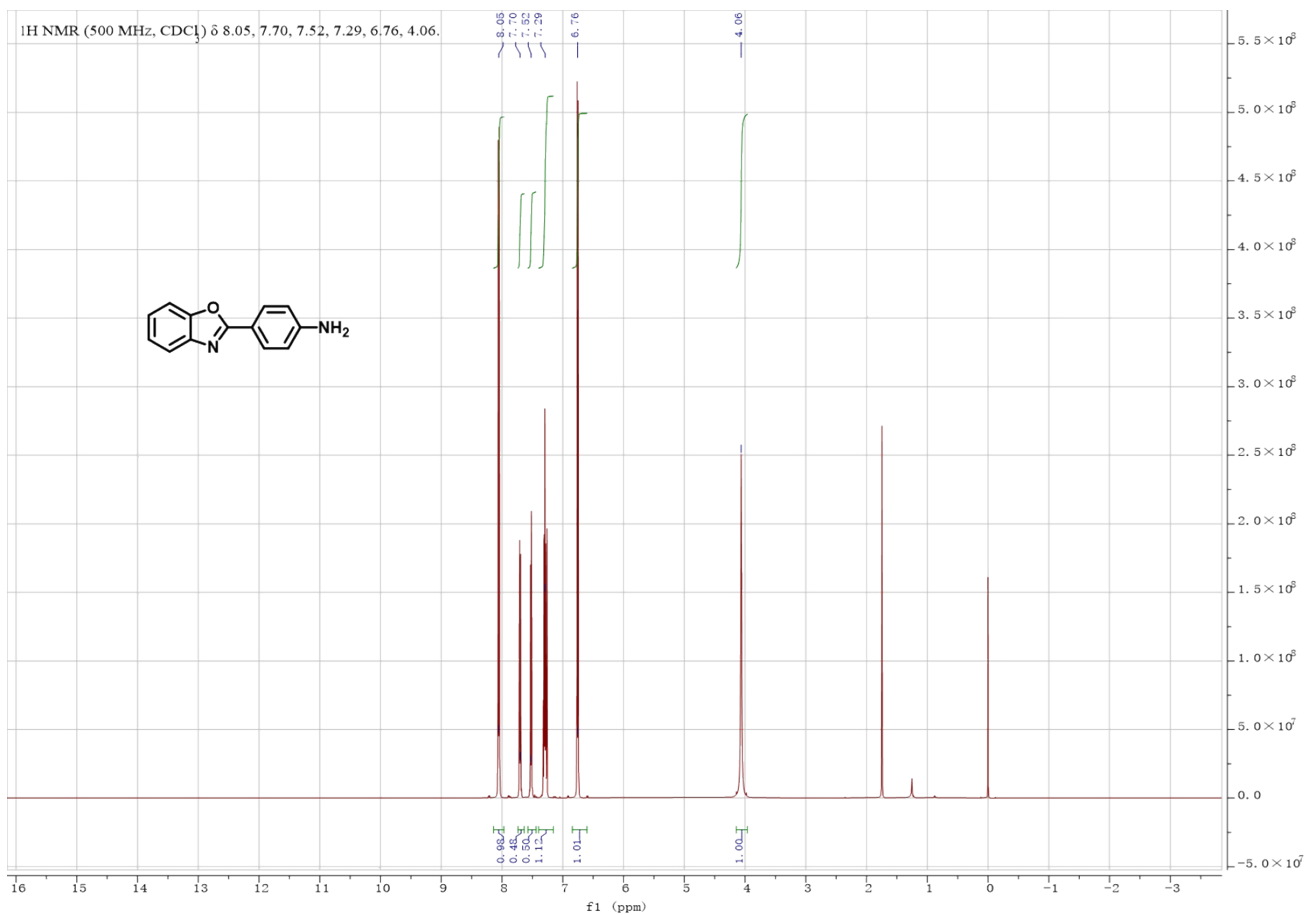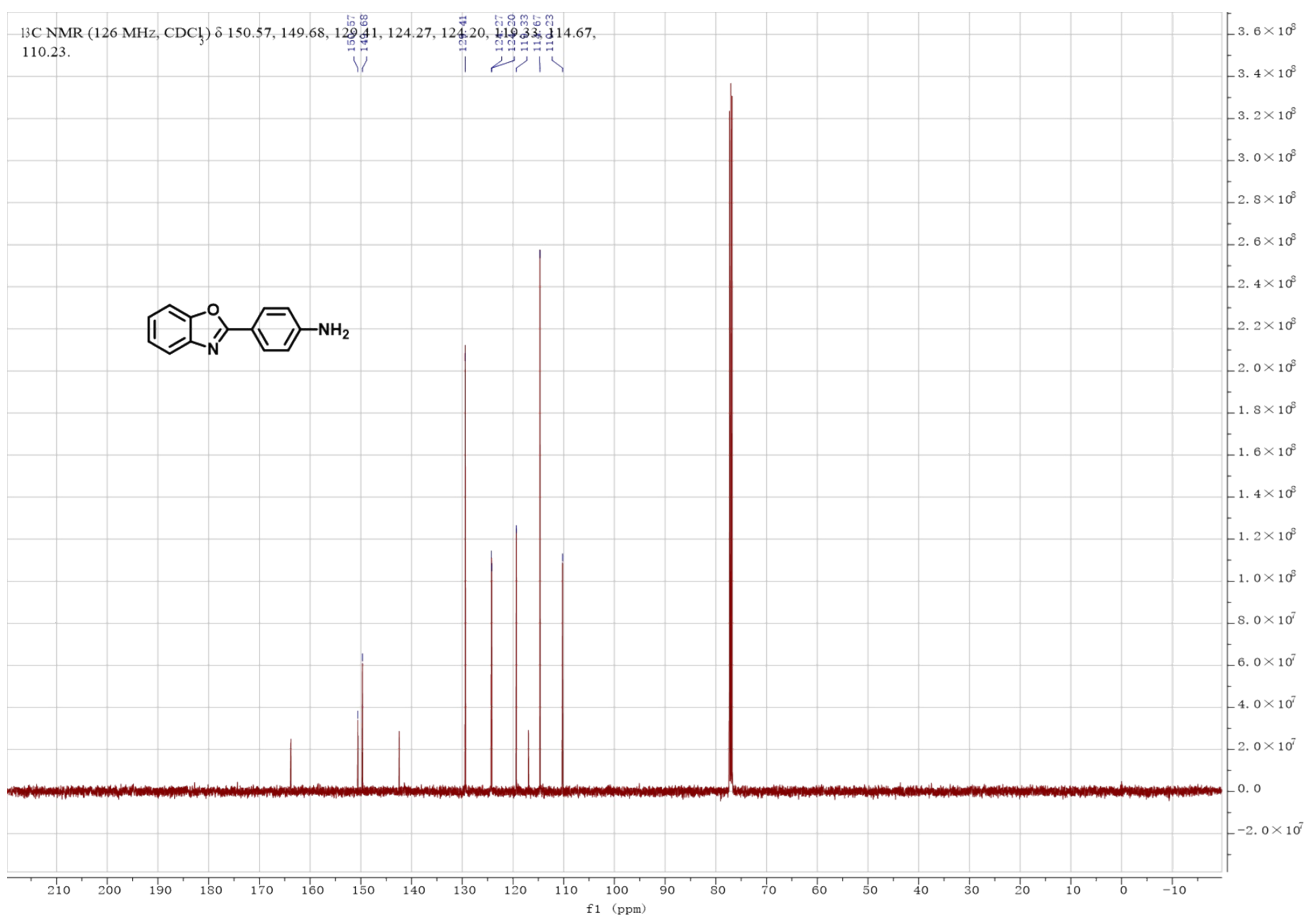

CLN-GXL-G2. 1. fid

<sup>1</sup>H NMR (500 MHz, DMSO)  $\delta$  8.22, 8.21, 8.20, 8.04, 8.03, 8.02, 7.76, 7.70, 7.69, 7.68, 7.67, 7.51, 7.46, 7.44, 7.43, 2.63, 2.52.

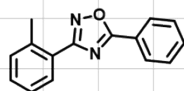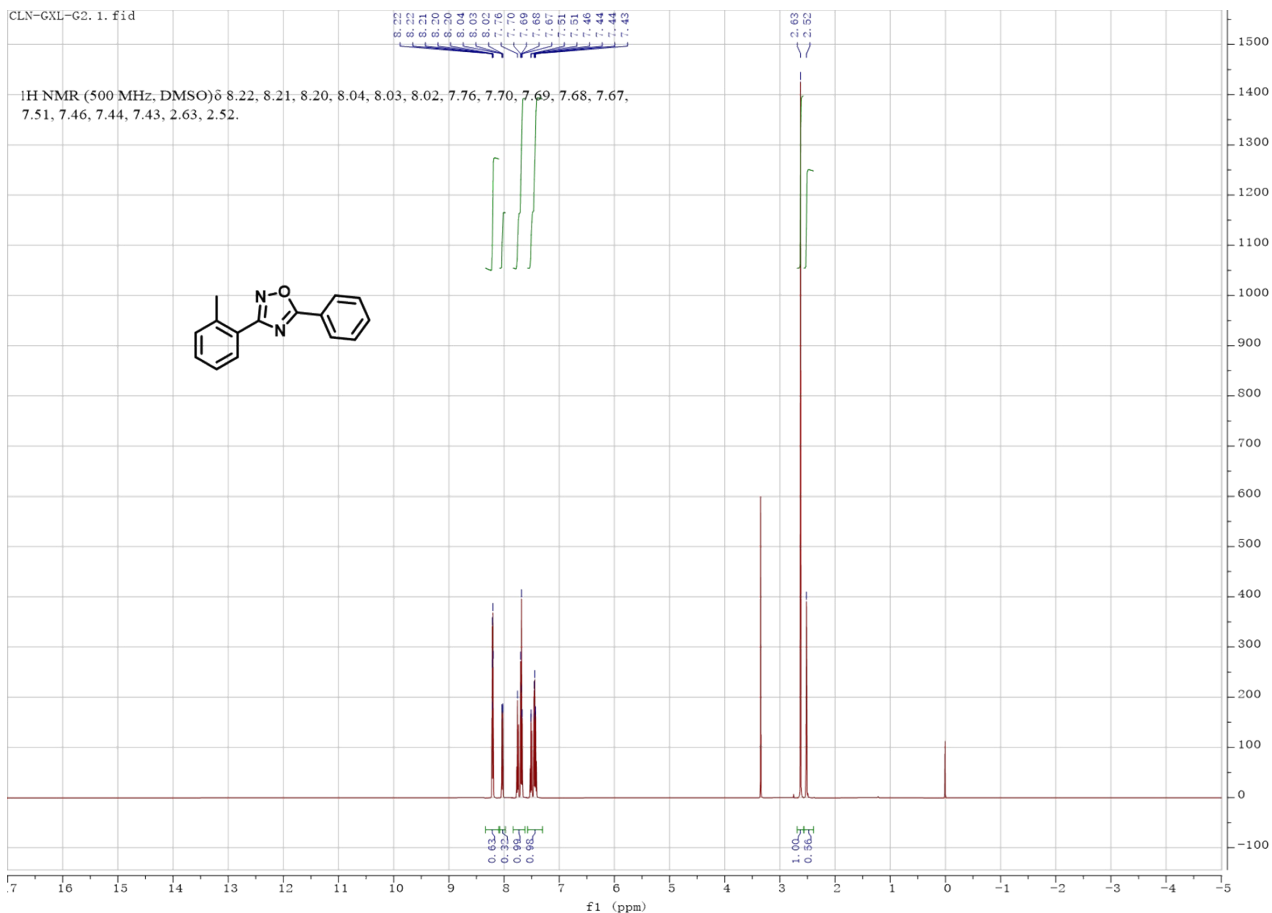

CLN-GXL-G2. 2. fid

<sup>13</sup>C NMR (126 MHz, DMSO)  $\delta$  174.91, 169.41, 138.10, 133.81, 131.98, 131.47, 130.29, 130.09, 128.43, 126.77, 126.04, 123.91, 24.15, 22.11.

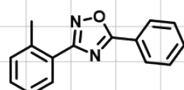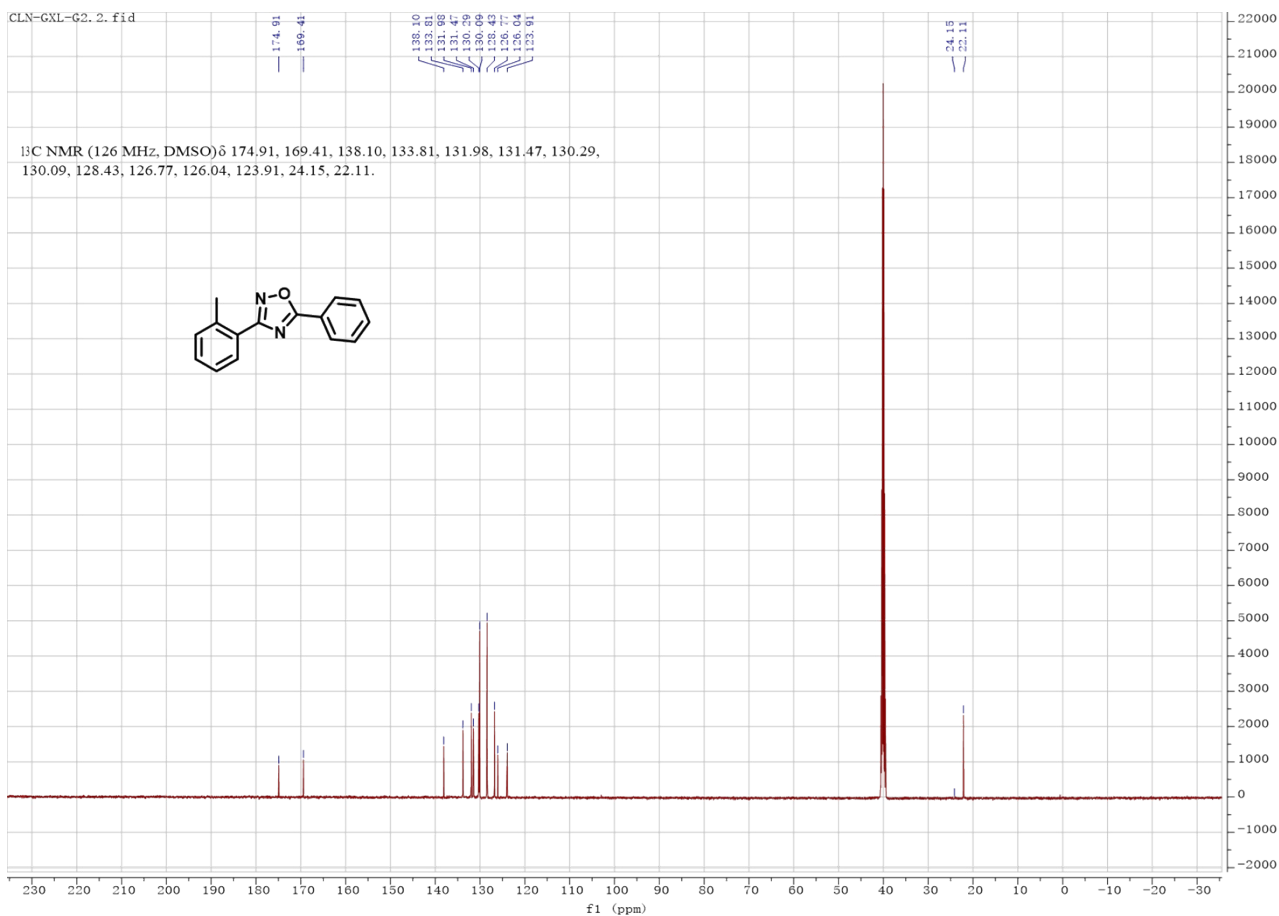

Supplement: d5ta08285d1.pdf [file d5ta08285d1.pdf]
